# Mapping inter-individual functional connectivity variability in

## TMS targets for major depressive disorder

Shreyas Harita<sup>1,2</sup>, Davide Momi<sup>2</sup>, Frank Mazza<sup>2,3</sup>, John D. Griffiths<sup>1,2,4,\*</sup>

### *Affiliations:*

1 = Institute of Medical Science, University of Toronto

2 = Krembil Centre for Neuroinformatics, Centre for Addiction and Mental Health (CAMH),  
Toronto

3 = Department of Physiology, University of Toronto

4 = Department of Psychiatry, University of Toronto

\* = Corresponding Author

### *Highlights:*

- E-field modelling and functional connectivity used to study TMS targets (dlPFC,OFC)
- Considerable variability in TMS target E-field patterns seen across subjects
- Large inter-subject differences in target connectivity observed and characterized
- Major functional networks targeted by dlPFC, OFC TMS were the VAN, FPN and DMN
- Insights can contribute to improved and more personalized TMS therapies in the future

### *Keywords:*

TMS, Functional Connectivity, E-fields, Modelling, Human, Depression

# Abstract

Transcranial magnetic stimulation (TMS) is an emerging alternative to existing treatments for major depressive disorder (MDD). The effects of TMS on both brain physiology and therapeutic outcomes are known to be highly variable from subject to subject, however. Proposed reasons for this variability include individual differences in neurophysiology, in cortical geometry, and in brain connectivity. Standard approaches to TMS target site definition tend to focus on coordinates or landmarks within the individual brain regions implicated in MDD, such as the dorsolateral prefrontal cortex (dlPFC) and orbitofrontal cortex (OFC). Additionally considering the network connectivity of these sites (i.e. the wider set of brain regions that may be mono- or poly-synaptically activated by TMS stimulation) has the potential to improve subject-specificity of TMS targeting and, in turn, improve treatment outcomes. In this study, we looked at the functional connectivity (FC) of dlPFC and OFC TMS targets, based on induced electrical field (E-field) maps, estimated using the SimNIBS library. We hypothesized that individual differences in spontaneous functional brain dynamics would contribute more to downstream network engagement than individual differences in cortical geometry (i.e., E-field variability). We generated individualized E-field maps on the cortical surface for 12 subjects (4 female) from the Human Connectome Project database using tetrahedral head models generated from T1-weighted MR images. F3 and Fp1 electrode positions were used to target the left dlPFC and left OFC, respectively. We analyzed inter-subject variability in the shape and location of these TMS target E-field patterns, their FC, and the major functional networks to which they belong. Our results revealed the key differences in TMS target FC between the dlPFC and OFC, and also how this connectivity varies across subjects. Three major functional networks were targeted across the dlPFC and OFC: the ventral attention, fronto-parietal and default-mode networks in the dlPFC, and the fronto-parietal and default mode networks in the OFC. Inter-subject variability in cortical geometry and in FC was high. Our analyses showed that use of normative neuroimaging reference data (group-average or representative FC and subject E-field) allow prediction of which networks are targeted, but fail to accurately quantify the relative loading of TMS targeting on each of the principal networks. Our results characterize the FC patterns of canonical therapeutic TMS targets, and the key dimensions of their variability across subjects. The high inter-individual variability in cortical geometry and FC, leading to high variability in distributions of targeted brain networks, may account for the high levels of variability in

physiological and therapeutic TMS outcomes. These insights should, we hope, prove useful as part of the broader effort by the psychiatry, neurology, and neuroimaging communities to help improve and refine TMS therapy, through a better understanding of the technology and its neurophysiological effects.

# 1 Introduction

## 2 *TMS stimulation therapy targets and the neurobiology of major depressive disorder*

3 A considerable number of patients with major depressive disorder (MDD) do not respond to  
 4 first-line therapies such as drugs or psychotherapy. People who fail two or more  
 5 pharmacological interventions of a sufficient dose and time are characterized as having treatment  
 6 resistant depression (TRD; Souery et al., 1999). Transcranial magnetic stimulation (TMS) is an  
 7 efficacious and cost-effective treatment for people with TRD, and is an emerging alternative to  
 8 existing treatments for MDD, as well as a variety of other neurological and psychiatric disorders.  
 9 However, the clinical utility of TMS remains limited by the large heterogeneity in its clinical  
 10 outcomes. One factor believed to contribute to this variable clinical response among patients is  
 11 individual differences in structural and functional brain connectivity (Downar and Daskalakis,  
 12 2013). In order to find a target site for TMS treatment, region-based approaches have focused on  
 13 individual brain regions implicated in MDD, such as the dorsolateral prefrontal cortex (dlPFC),  
 14 dorsomedial prefrontal cortex (dmPFC) and orbitofrontal cortex (OFC). On the other hand,  
 15 network-based approaches have shown how TMS efficacy can be improved by considering not  
 16 only the location of the primary stimulation site (dlPFC, OFC, etc.), but also its connectivity - i.e.  
 17 the wider set of distal brain regions that are mono- or poly-synaptically activated by TMS  
 18 stimulation (Drysdale et al., 2017; Fox et al., 2013).

19 Previous studies have shown that variability in clinical efficacy of dlPFC-targeted repetitive  
 20 TMS (rTMS) treatment for MDD is related to differences in the functional connectivity (FC) of  
 21 the specific dlPFC locations stimulated (see Fox et al., (2012), Cash et al., (2020)). These  
 22 observations suggest that a detailed examination of individual differences in FC patterns for  
 23 frontal lobe rTMS targets should prove useful in further refining TMS targeting methodologies.  
 24 The aim of the present study was to undertake such an examination. Specifically, we  
 25 characterized the FC patterns of the dlPFC and OFC, based on E-field maps generated by  
 26 biophysical simulations of TMS stimulation effects on the cortex (see *Methods*). Our hypothesis  
 27 was that individual differences in spontaneous functional brain dynamics would contribute more  
 28 to downstream network engagement than individual differences in cortical geometry (i.e., E-field



variability), which may in turn explain some of the observed heterogeneity of rTMS treatment outcomes.

By far the most commonly targeted site in rTMS treatment of MDD is the dlPFC. That this region is known to play a critical role in executive functions such as attention, planning, and organization, and up-regulation of the circuits underlying these neurocognitive functions is one potential explanation for its positive therapeutic effects. rTMS stimulation of the left dlPFC has also been observed to regulate FC to and between the reward- and emotion-related regions of the meso-cortico-limbic dopamine pathway, that have also been consistently implicated in MDD (Tik et al., 2017). However, stimulation of the left dlPFC does not work for all patients, with only around 46% of MDD patients achieving response, and only 31% achieving remission after a standard rTMS treatment course (Fitzgerald et al., 2016). This may be due to inter-subject differences in neurochemistry, in connectivity, in their specific MDD neuropathology, or a variety of other potential factors. To overcome this issue of limited success with dlPFC targeting, several groups have begun to explore alternative rTMS targets to treat MDD, such as the dmPFC and the OFC (Downar and Daskalakis, 2013).

Recent research has shown that the OFC is hyperactive in MDD (Feffer et al., 2018). The OFC consists of a medial (mOFC) and a lateral (lOFC) subdivision, each with unique anatomical and FC profiles. The OFC has extensive cortico-cortical and cortico-striatal connections to regions implicated in MDD such as the cingulate cortex, caudate, striatum, hypothalamus, amygdala, hippocampus, insula, and thalamus (Zald et al., 2014). Recently, studies have begun to explore the OFC as a TMS target, with the rationale being to stimulate these MDD-implicated cortico-cortical and cortico-striatal loops. The OFC and its downstream connections are principal contributors to reward and reversal learning (Kringelbach, 2005), predictive and fictive error assessment (Boorman et al., 2013), emotional regulation, and generation of affective states (Rolls, 2019). Due to the wide psychiatric implications of pathological OFC activity, this region has been growing in popularity as an alternative rTMS treatment target for mental illness. For example, low frequency (1Hz) rTMS of the left OFC has been shown to ameliorate symptoms in patients with obsessive-compulsive disorder (OCD; Kumar et al., 2018). Relatedly, 1Hz rTMS to the right OFC in a recent study saw nearly a quarter of patients suffering from MDD achieve remission (Feffer et al., 2018). Importantly, these patients previously showed minimal response

to dmPFC-rTMS. These results point to heterogeneous mechanisms of action, and therefore therapeutic effect, for dlPFC-, dmPFC-, and OFC-rTMS, possibly due to their unique downstream connections.

### *E-field modelling and cortical geometry*

TMS uses high intensity magnetic field pulses to influence neuronal activity. The TMS coil produces a time-varying magnetic field, which in turn induces a focal electric field (E-field) within brain (principally cortical) tissue. E-field modelling is a relatively new approach that uses computationally estimated E-field maps, which can serve as a proxy to identify the region of the brain that is stimulated for a given coil type, location, orientation, and (MRI scan-derived, subject-specific) head and brain characteristics (Opitz et al., 2011; Thielscher et al., 2015; Weise et al., 2020). These methodologies are increasingly used in clinical and basic TMS research, as a means to better understand and minimize the sources of variability in TMS outcomes due to the varying placement of TMS coils on the subject's scalp, and to variability in each individual's skull anatomy and cortical geometry.

Approaches to TMS coil placement include the '5cm-rule', 10-20 EEG electrode locations, MRI-guided anatomical targeting, and the more recent fMRI FC-guided targeting. However, there is a considerable amount of variability in the 'ideal' TMS coil placement to optimally stimulate a specific target. For example, the F3 10-20 electrode position may result in different parts of the dlPFC being stimulated in different individuals. Moreover, previous research has shown that differences in the complex neuroanatomy of each individual human skull and brain (i.e., brain size, gyri and sulci differences) results in E-fields of varying shapes, sizes and depths (Thielscher et al., 2011). The combined effect of TMS coil placements and subject-specific differences in skull anatomy and cortical geometry leads to an inter-subject variation in E-field patterns across patients/subjects, and is a potential explanation for some of the high variability in rTMS therapy outcomes. Furthermore, the interaction between these cortical geometry-driven variability in TMS induced E-fields and variability in intrinsic FC patterns, despite receiving some attention from researchers previously (Opitz et al., 2016), remains poorly understood.

87

## 88 *Present study*

89 It is likely that the dlPFC and OFC have unique functional connections, through which they each  
 90 exert their differential therapeutic effects following rTMS treatment (Vila-Rodriguez and  
 91 Frangou, 2021). The patterns of these connections likely vary considerably across subjects, and  
 92 very little is currently known about the relative contributions of these variability sources to TMS  
 93 treatment outcomes. In the present study, we therefore sought to address part of this knowledge  
 94 deficit, by systematically examining E-field and FC patterns for dlPFC and OFC TMS target  
 95 sites, using structural and functional neuroimaging scans in a group of healthy control subjects.  
 96 We computed simulated TMS E-fields centered at the dlPFC and OFC, and studied their FC  
 97 patterns using both individual and group averaged resting-state fMRI data. We found specific  
 98 networks being targeted as a result of dlPFC or OFC TMS. While the same major networks were  
 99 targeted consistently across our subject cohort, substantial inter-individual differences in each  
 100 subject's specific relation to these networks were also observed. Comparing individual subject  
 101 and group-average FC patterns for a consistent E-field-defined seed region allowed us to assess  
 102 the contribution of inter-individual variability in FC patterns, independently of variability in  
 103 cortical geometry. Conversely, comparing FC patterns for a single group-level E-field seed to  
 104 those for subject-specific E-field seeds allowed us to quantify variability in TMS target  
 105 connectivity due purely to skull and cortical geometry variation. Our results highlight the inter-  
 106 individual differences in dlPFC and OFC TMS FC, potentially paving the way for personalized  
 107 rTMS therapy in the future.

108

## 109 **Methods**

110 Analysis of T1-weighted anatomical MRI (for E-fields) and fMRI (for FC) data was conducted  
 111 for 12 randomly selected subjects from the human connectome project (HCP) database, looking  
 112 specifically at FC patterns related to dlPFC and OFC TMS stimulation. We computed TMS E-  
 113 fields using the SimNIBS software package, and focused on the cortical surface component of  
 114 the stimulated tissue. The group average and individual subject HCP CIFTI dense connectomes

were used to determine the FC of TMS targets to the rest of the brain; and we used the standard Yeo/Schaefer parcellations to summarize the downstream connections of the dlPFC and OFC. Finally, we defined a framework for assessing contributions to overall variability from cortical geometry, FC, and from a combination of these two sources. Each of these steps are detailed below.

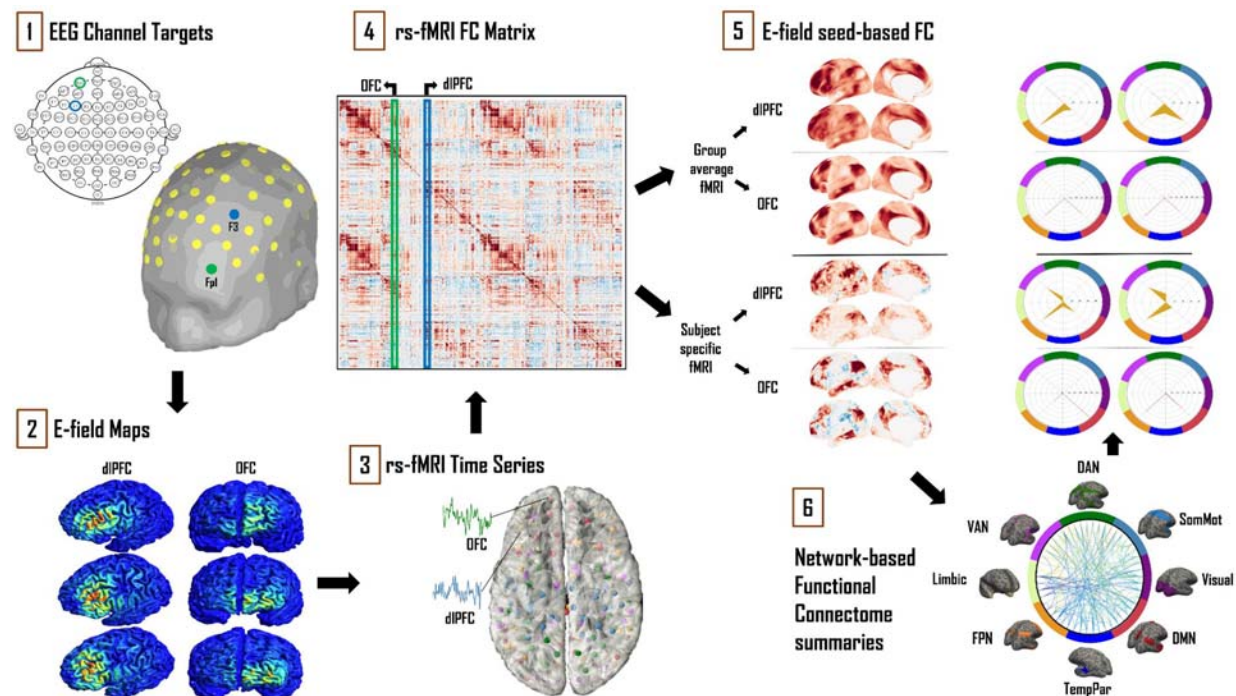

**Figure 1: Schematic of the analytical approach.** 1) Left dlPFC and OFC 10-20 EEG electrode locations were identified as F3 and Fp1, respectively. 2) SimNIBS simulations were run using these electrode locations as TMS coil placements, with the main output of interest being cortical surface E-field maps. 3) Resting state fMRI time series for 12 subjects from the HCP database were averaged and converted into ‘dense connectome’ FC matrices. 4) The connectivity patterns of each subject’s E-field were determined using these dense connectomes. 5) FC maps of the resulting E-fields were thus obtained with group-averaged and subject-specific resting-state fMRI data. 6) These maps were further analyzed and summarized in terms of connectivity to the canonical multi-network parcellation templates of Yeo et al., (2011). The most prominent networks targeted by dlPFC and OFC TMS are reported. Spider plot visualizations in this example and later figures show the networks being targeted as a percentage (area of orange polygon) of the suprathreshold E-field vertices.

## Determining the TMS E-field

The TMS-induced electric field was modelled using tools from the SimNIBS software library (Thielscher et al., 2015). A tetrahedral surface mesh head model (.msh file) was created from T1-weighted MR images and Freesurfer tissue segmentations for twelve subjects (4 female) from the HCP database. This mesh consisted of five tissue types: white matter (WM), grey matter (GM), cerebro-spinal fluid (CSF), skull, and scalp. The assigned conductivity values were fixed, as per the SimNIBS defaults: 0.126 S/m (WM), 0.275 S/m (GM), 1.654 S/m (CSF), 0.01 S/m (skull), and 0.465 S/m (scalp). In order to investigate possible effects due to head geometry, two head mesh types were used as part of the SimNIBS analysis pipeline. The first were each subject's unique head meshes, as derived from that subject's own neuroanatomical MRI scans. The second was the general template head mesh, 'ernie.msh', which is distributed as a part of SimNIBS. The EEG 10-20 system F3 electrode was selected to target the left dlPFC, for two reasons: First: EEG F3 is in our experience currently the most commonly used left dlPFC targeting method in clinical rTMS practices. Second: it has been reported that TMS targeting approaches based on the 10-20 EEG system account better for variability across different skull shapes and sizes than scalp-based measurements such as the '5cm rule' (Cash et al., 2020). With regards to the OFC, previous work has shown that targeting right OFC via the Fp2 electrode led to remission in MDD patients unresponsive to dlPFC- and dmPFC-rTMS (Fettes, 2020). Given the high level of anatomical symmetry between hemispheric homologues, here we used the Fp1 electrode (left-side homologue of Fp2, thus targeting left OFC), so as to keep both TMS targets in the left hemisphere. This approach enabled us to make more direct comparisons between dlPFC and OFC, minimizing extraneous methodological differences. We strongly expect our left OFC results to generalize well to right OFC targets, although we leave the full demonstration of this for future work. The left dlPFC has been used as a target for rTMS therapy almost since the technique's inception (George et al., 1995), and while there are heterogenous outcomes associated with left dlPFC rTMS, it is still one of the most widely used rTMS targets for MDD (Cash et al., 2020; Pascual-Leone et al., 1996). The use of the OFC as a TMS target to treat psychiatric disorders, while still a novel and largely underexplored idea, has recently gained traction - with OFC rTMS showing promise in treating MDD (right OFC; Feffer et al., 2018) and OCD (left OFC; Kumar et al., 2018).

At both coil centres (F3, Fp1), the coils were positioned using the standard orientation to ensure that the resulting E-field is directed perpendicularly into the cortex. Previous studies have shown

that this standard orientation is able to achieve the highest perpendicular E-field values (Janssen et al., 2015). This is done by pointing the coil handle away from the midline of the cortex. The y-direction position values for the dlPFC (F3) and OFC (Fp1) are therefore F5 and AF7, respectively. Of the various coil models available in SimNIBS, we used the Magstim 70mm Figure-8 coil, which is the most common coil type in both clinical and research settings. To keep our focus primarily around the target regions (dlPFC, OFC), we used a threshold of 0.9 Volt/meter (V/m) to limit the size of the E-field obtained (Romero et al., 2019). We report the E-field sizes in terms of ‘number of vertices’, where the vertices in question are from the left hemisphere surface portion of CIFTI-space dense connectomes that consist of 32,000 vertices per hemisphere. The average face area (and therefore approximate E-field physical unit size) for these CIFTI 32K surfaces is 0.05 mm<sup>2</sup>.

## ***Functional Connectivity***

Resting-state fMRI data of the 12 HCP subjects was used to study the FC of TMS target regions. For full details on the HCP acquisition protocols and related information, see (Glasser et al., 2013; Uğurbil et al., 2013; Van Essen et al., 2013, 2012).

For subject-specific FC analyses, the FC for the CIFTI format time series for each HCP subject’s four resting-state fMRI scans were averaged and converted into ‘dense connectome’ (Pearson correlation) FC matrices, each containing 91,282 rows and columns (corresponding to ~64,000 cortical surface vertices, and ~27,000 sub-cortical voxels). For group-level FC analyses, the HCP\_S1200\_GroupAvg\_v1 (1003 subjects) dense connectome was used instead of individual-subject data. The FC of a given E-field was determined by taking the average FC, over all the vertices within that E-field, to every other node in the dense connectome FC matrix. Note that in this study we only studied connectivity within the stimulated (i.e. the left) hemisphere. In order to summarize which downstream regions were functionally connected to the stimulated areas, we grouped the connectivity profiles of dlPFC and OFC stimulation target sites according to the canonical functional network parcellation of Yeo et al. (2011) and Schaefer et al. (2018). These canonical networks consisted of the visual (Vis), somato-motor (SomMot), dorsal attention (DAN), ventral attention (VAN), limbic, fronto-parietal (FPN), temporo-parietal (TempPar) and



default-mode (DMN) networks (Yeo et al., (2011), Schaefer et al., (2018)). These canonical Yeo/Schaefer network summaries give a useful low-dimensional complement to the high-dimensional (E-field seed column-averaged) FC dense connectome columns, helping us to gain a better understanding of which functional networks might be stimulated by TMS, and how the pattern of stimulated areas varied between target sites (dlPFC, OFC) and across subjects. Here, the individual units of a Yeo/Schaefer parcellation-based functional connectome are the brain regions identified by Schaefer et al. (2018), and serve as building blocks for functional brain anatomy. In the context of network analysis, each parcel represents a single node within a whole brain network. In the following, we therefore refer to these individual Yeo/Schaefer parcels as network ‘nodes’. In all subjects, we analyzed E-field variability, FC patterns, and the major nodes of the most common functional networks and the FC maps they created.

To explore the impact of individual brain features on the variability of TMS target connectivity, we delineated a two-level FC analysis framework. At the first level (1a, 1b), the two most likely main sources of TMS FC variability are analyzed separately, and at the second level (2) they are analyzed in combination:

**1a. Influence of individual head, skull, and cortical geometry on TMS target connectivity patterns.** To examine this we computed the variability shown in the E-fields by holding the FC constant. To do this, we used each subject’s unique head mesh to determine their individualized E-field map. As described above, the connectivity of each subject’s specific E-field to the canonical HCP\_S1200\_GroupAvg\_v1 resting-state FC matrix was studied.

**1b. Inter-subject differences in TMS target connectivity due purely to each subject’s unique functional connectivity profile.** This line of analysis involved using the same E-field across all subjects, but combining it with individualized FC. The SimNIBS general template head mesh (‘ernie.msh’) was used to generate a fixed E-field pattern for all subjects, for each of the two TMS targets. The connectivity patterns of this fixed E-field to the rest of the brain was calculated using each subject’s individual FC matrix, derived from their four resting-state fMRI scans. This approach allowed us to measure the effect of individual spatial FC fingerprints on TMS target connectivity.

**2. Combined influence of individual cortical geometry and individual functional connectivity structure on TMS target connectivity patterns.** To represent the ‘real-world’ scenario, where individual characteristics of both cortical geometry and FC jointly contribute to TMS target connectivity patterns, we combined the approaches in 1a and 1b above, and studied patterns using both each subject’s unique head mesh and their specific FC matrices.

## ***Statistical Analysis***

To evaluate statistically the hypothesis that, for each of the two TMS target regions, there was differential loading across downstream brain networks, connectivity scores were compared separately for dlPFC and OFC using repeated-measures one-way ANOVA, with the (within-subjects) factor “NETWORK” (8 levels for the 8 functional networks: Vis, SomMot, DAN, VAN, Limbic, FPN, TempPar, DMN). Subsequent pairwise post-hoc comparisons were performed to determine significant differences between NETWORK levels. The critical p-value was then adjusted using Tukey correction to account for multiple comparisons (\*\*.05; Tukey corrected; \*.05 uncorrected).

## ***Code and Data Availability***

All analyses reported in this paper were conducted on CentOS linux compute servers running Python 3.7.3, using the standard scientific computing stack and several open-source neuroimaging software tools - principally SimNIBS (E-field simulations; Thielscher et al., 2015), Nibabel (neuroimaging data I/O; Brett et al., 2020) and Nilearn (neuroimaging data visualizations; Abraham et al., 2014). All code and analysis results are openly available at [github.com/griffithslab/HaritaEtAl2021\\_tms-efield-fc](https://github.com/griffithslab/HaritaEtAl2021_tms-efield-fc).

## **Results**



## *Influence of individual cortical geometry on TMS target connectivity patterns*

### *E-field variability*

There was considerable variability across the subject group in the estimated amount of activated tissue in the vicinity of each TMS target location, as defined by the spatial extent of the thresholded E-field surface maps. At the dlPFC, E-field size ranged from 415 to 1037 vertices ( $663.2 \pm 199.8$ ). The OFC on the other hand was smaller in terms of overall E-field size, ranging from 106 to 300 vertices ( $162.3 \pm 57.0$ ). The E-field sizes varied to a greater extent for dlPFC stimulation (scalp position F3) than for OFC stimulation (scalp position Fp1) (Fig. 2 - **Panel A**). (See *Methods* for information on the threshold value chosen and on physical dimensions of surface units).

### *Functional network connectivity based on subject-specific E-fields*

We analyzed connectivity strength within each subject's E-field maps by comparing maximum FC values. A significant main effect of "NETWORK" was found at the dlPFC ( $F_{(1,7)} = 141.66$ ,  $p < 0.0001$ ,  $\eta^2 = 0.93$ ) and OFC ( $F_{(1,7)} = 424.64$ ,  $p < 0.0001$ ,  $\eta^2 = 0.97$ ). Across all subjects, three networks from the Yeo et al. (2011) functional network parcellations had maximum FC to vertices in the dlPFC and OFC E-fields. In the dlPFC, the VAN ( $33.4 \pm 4.7\%$ ), FPN ( $28.9 \pm 5.8\%$ ) and DMN ( $22.9 \pm 6.3\%$ ) accounted for an average of 85% of the E-field vertices. In the OFC, the FPN ( $51.5 \pm 6.4\%$ ) and DMN ( $46.4 \pm 6.5\%$ ) accounted for 98% of the E-field vertices. In addition to the above, other functional parcels with FC to the E-field vertices include the somato-motor and temporo-parietal networks. (Fig. 2 - **Panel B**).

### *Relationship between TMS targets and downstream brain regions in subject-specific E-fields*

After summarizing the overall structure of TMS target connectivity to the rest of the brain in terms of E-field vertex FC to the eight canonical Yeo networks, we examined more closely the spatial topographies of these FC patterns. Specifically, we studied the seed-based FC maps (where the seed is the entire thresholded E-field, and the maps are averaged over vertices within

the seed) for each subject and target site, and identified through extensive manual inspection the dominant and consistent sub-patterns within those maps. Specific brain regions in the VAN, FPN and DMN were highlighted with dIPFC-TMS stimulation. On the lateral cortical surface, key nodes within the VAN included the frontal and parietal opercula, lateral prefrontal cortex (PFC), and insular cortex. The main lateral FPN nodes were the posterior part of the middle and inferior temporal gyri, inferior parietal lobule (IPL) and the lateral-ventral and lateral PFC. Medial FPN nodes included the precuneus, mid-cingulate cortex and medial-posterior PFC. Within the DMN, we observed the IPL, the lateral and ventral PFC on the lateral cortical surface; while the dorsal-medial and medial PFC constituted the medial DMN nodes. On the medial surface of the cortex, we observed FPN and DMN nodes, however, there were no specific VAN nodes (Fig. 2 - **Panel C [top]**). With regards to the OFC, specific regions in the FPN and DMN were highlighted. Within the FPN, laterally, we observed several of the same nodes noted above, including the lateral-ventral, lateral PFC and IPL. Medial FPN nodes included the medial-posterior PFC and precuneus. In the DMN, the IPL and lateral PFC were seen once again as key nodes laterally. Medial DMN nodes included the dorsal-medial, medial PFC, and precuneus. DMN nodes specific to the OFC included the dorsal PFC and the anterior portion of the middle and inferior temporal gyri on the lateral cortical surface; and the posterior cingulate cortex (PCC) on the medial cortical surface (Fig. 2 - **Panel C [bottom]**). Critically, similar key nodes within different functional networks showed markedly different FC patterns between the two TMS target sites.

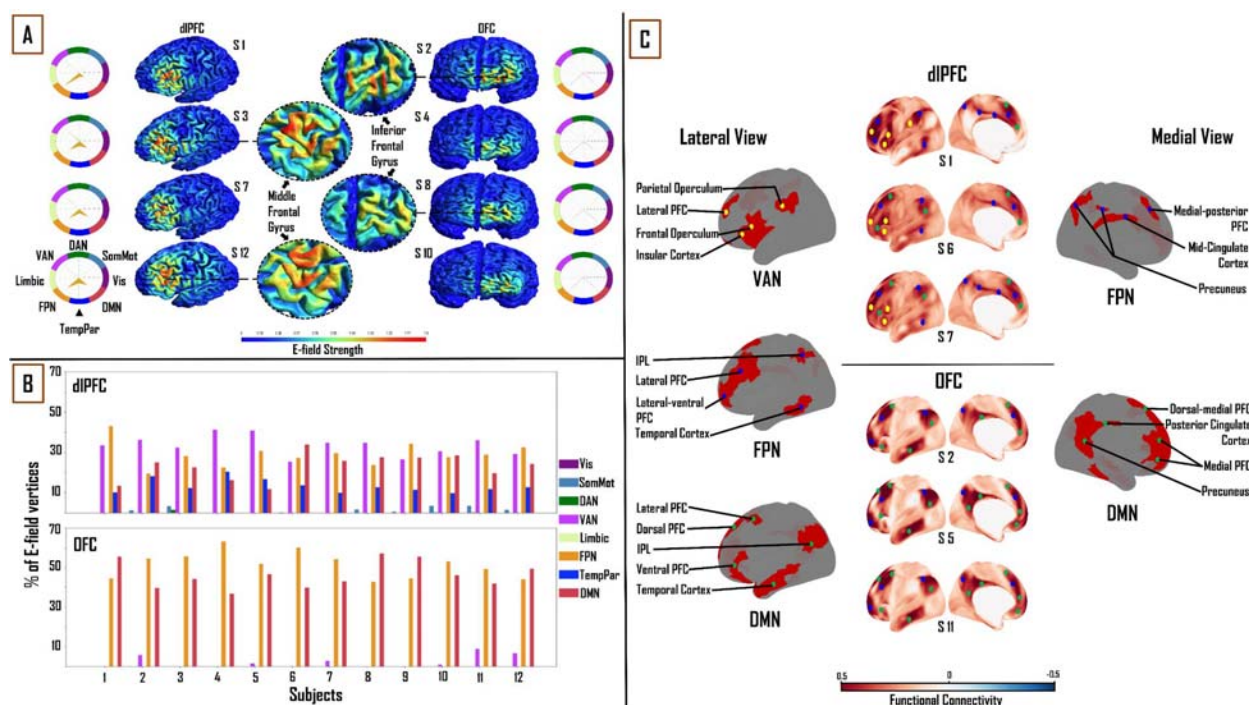

**Figure 2: Influence of individual cortical geometry on TMS target connectivity.** **A)** Individual subject E-fields for a subset of subjects highlighting anatomical differences between dIPFC and OFC E-fields. Spider plots on either side show functional network connectivity (expressed as a percentage of E-field vertices), based on the group-average FC matrix. E-field unit = V/m. **B)** Maximum FC of each functional network parcellation, represented as a percentage of E-field vertices, for all subjects. Top: VAN, FPN and DMN accounted for 85% of E-field vertices in the dIPFC. Bottom: FPN and DMN accounted for ~98% of the E-field in OFC. **C)** *Top:* Lateral and medial view of dIPFC FC maps in subjects 1, 6 and 7, highlighting the key regions that are functionally connected across VAN, FPN and DMN. These regions lie mainly in frontal, parietal and temporal cortices. *Bottom:* Lateral and medial view of OFC FC maps in subjects 2, 5 and 11, highlighting key regions that are functionally connected across FPN and DMN. These regions lie mainly in medial-frontal, cingulate and posterior parietal cortices. VAN = ventral attention network, FPN = fronto-parietal network, DMN = default-mode network.

### ***Influence of connectivity structure on TMS target connectivity patterns***

In the previous section we held the FC matrix fixed, allowing us to characterize inter-subject differences in (putative) TMS target connectivity resulting purely from variation in head, skull, and brain anatomy and geometry. We now examine the reverse scenario: inter-subject differences in TMS target connectivity due purely to the individualized FC, but using a single fixed E-field map for all subjects.

313

# 314 *E-field Variability*

315 The size of the constant E-field at the dlPFC was 310 vertices and at the OFC was 63 vertices  
316 (Fig. 3 - **Panel A**).

317

## 318 *Functional network connectivity based on constant E-fields*

319 One-way ANOVA identified a significant main effect of “NETWORK” for both dlPFC ( $F_{(1,7)}=$   
320  $41.12$ ,  $p < 0.0001$ ,  $\eta^2 = 0.79$ ) and OFC ( $F_{(1,7)}= 31.06$ ,  $p < 0.0001$ ,  $\eta^2 = 0.74$ ). The same three  
321 functional networks from the subject-specific analysis were seen to have maximum FC to  
322 vertices in the constant E-field across subjects. In the dlPFC, dominant connectivity to the VAN  
323 ( $31.3 \pm 11.2\%$ ), FPN ( $26.9 \pm 7.1\%$ ) and DMN ( $23.9 \pm 6.2\%$ ) together accounted for 82% of E-  
324 field vertices. In the OFC, the FPN ( $23.7 \pm 13\%$ ) and DMN ( $48.7 \pm 17.4\%$ ) together accounted  
325 for 72% of the E-Field vertices (Fig. 3 - **Panel B**).

326

## 327 *The relation between TMS targets and downstream brain regions in constant E-fields*

328 Turning again to a detailed inspection of the seed-based FC maps, specific brain regions in the  
329 VAN, FPN and DMN were highlighted with dlPFC-TMS, and within the FPN and DMN in  
330 OFC-TMS. Within the VAN, similar to our findings in the previous section, the lateral PFC,  
331 frontal and parietal opercula, and the IPL were the key nodes observed on the lateral cortical  
332 surface. The lateral FPN nodes included the posterior regions of the middle and inferior temporal  
333 gyri, the IPL and the lateral-ventral and lateral PFC. We noted the precuneus and medial-  
334 posterior PFC as the main medial FPN nodes. Key DMN nodes included the lateral PFC and the  
335 dorso-medial and medial PFC. Again, as in the previous section, on the medial surface of the  
336 cortex, we observed FPN and DMN nodes, but no specific VAN nodes were seen (Fig. 3 - **Panel**  
337 **C [top]**). At the OFC, on the lateral left cortical surface, the FPN included some of the same  
338 nodes noted above such as the lateral-ventral and lateral PFC, and the IPL. The main lateral  
339 DMN nodes included the IPL, the anterior portion of the middle and inferior temporal gyri, and

the dorsolateral PFC. On the medial left cortical surface, the DMN nodes included the dorsal-medial PFC, medial PFC, precuneus and PCC (Fig. 3 - **Panel C [bottom]**). It is important to clarify here that, while similar brain regions were seen appearing as key nodes within the different functional networks, the FC patterns were markedly different between the two TMS targets and across different subjects.

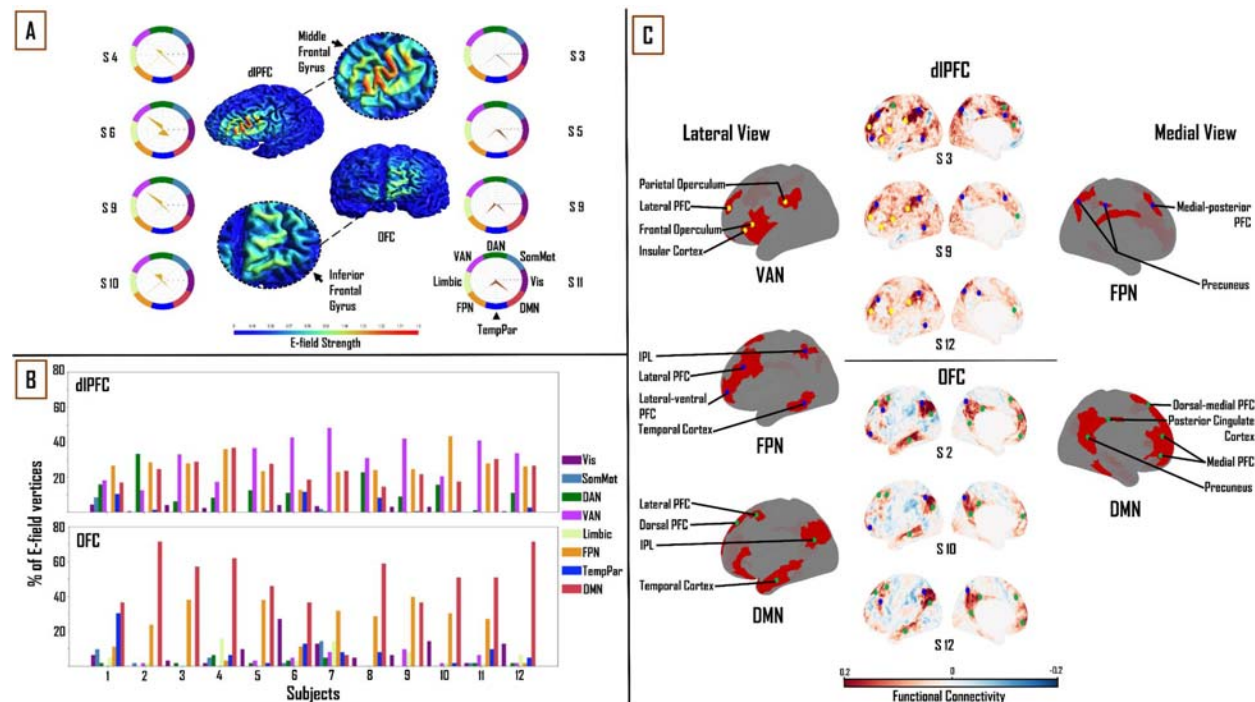

**Figure 3: Influence of individual subject FC on TMS target connectivity.** **A)** constant (ernie-based) dIPFC and OFC E-fields, from F3 and Fp1 TMS targets, are 310 and 63 vertices in size, respectively. Spider plots on either side show functional network connectivity (expressed as a percentage of E-field vertices), based on subject-specific FC matrices. E-field strength unit = V/m. **B)** Maximum FC of each functional network represented as a percentage of the E-field vertices of each subject. *Top:* VAN, FPN and DMN accounted for 82% of E-field vertices in dIPFC. *Bottom:* FPN and DMN accounted for 72% of E-field vertices in OFC. **C)** *Top:* Lateral and medial view of dIPFC FC maps in subjects 3, 9 and 12, highlighting the key regions that are functionally connected across the VAN, FPN and DMN. These regions lie mainly in frontal, parietal and temporal cortices. *Bottom:* lateral and medial views of OFC FC maps in subjects 2, 10 and 12, highlighting key regions that are functionally connected across the FPN and DMN. These regions lie mainly in medial-frontal, cingulate, and posterior parietal cortices (bottom). VAN = ventral attention network, FPN = fronto-parietal network, DMN = default-mode network.

**Combined influence of individual cortical geometry and individual connectivity structure on TMS target connectivity patterns**



In order to evaluate the similarity of the network engagement in the dlPFC and OFC (when using subject-specific E-fields) between the group average FC matrix and subject-specific FC matrices, we studied the Pearson correlation between the percentage of E-field vertices (Figs 2, 4 - **Panel B**) for the VAN, FPN and DMN, across all subjects, for these two FC matrix variants. For dlPFC targets, the group average and subject-specific FC matrices showed a high correlation in the percentage E-field vertices that maximally correlated with the DMN ( $r=0.67$ ), but this was not the case for the VAN and FPN ( $r=0.07$  and  $r=0.03$ , respectively). We found the opposite to be true in the OFC. Here, we observed that there was a higher correlation between the percentage of E-field vertices preferentially correlated with FPN ( $r=0.52$ ) than with DMN ( $r=0.2$ ), when comparing group average and subject-specific FC matrices.

Similarly, to determine the similarity of the network engagement in the dlPFC and OFC (when using subject-specific FC matrices) between the fixed ('ernie') E-field and subject-specific E-field, we looked at the Pearson correlation between the percentage of E-field vertices, for the VAN, FPN and DMN, across all subjects, for the two E-field variants. In the dlPFC, the fixed and subject-specific E-fields showed a much higher degree of correlation in proportion of vertices in each subject's specific FC matrix maximally targeting the VAN and FPN ( $r=0.82$  and  $r=0.76$ , respectively), than the DMN ( $r=-0.05$ ). In the OFC, we noticed the reverse to be true. The fixed and subject-specific E-field showed a higher correlation in proportion of vertices correlated with the DMN ( $r=0.7$ ), than with the FPN ( $r=0.4$ ). A comparison of the differences in patterns of FC between the fixed E-field and the subject-specific E-field can be found in Fig. 4 - **Panel A**. Taken together, these analyses indicate that the average E-field and group-average FC data are able to predict which networks are targeted, for some networks, but cannot necessarily tell the degree to which each individual network is specifically targeted across subjects.

*Functional network connectivity based on subject-specific E-fields and subject-specific functional connectivity matrices.*

Again, one-way ANOVA showed a significant main effect of "NETWORK" for dlPFC ( $F_{(1,7)} = 44.33$ ,  $p < 0.0001$ ,  $\eta^2 = 0.80$ ) and OFC ( $F_{(1,7)} = 45.48$ ,  $p < 0.0001$ ,  $\eta^2 = 0.81$ ). In the dlPFC, VAN ( $22.3 \pm 7.1\%$ ), FPN ( $32.4 \pm 7.4\%$ ) and DMN ( $21.4 \pm 7\%$ ) were seen to account for 76% of the E-

field vertices. FPN ( $37.6 \pm 12.4\%$ ) and DMN ( $43.5 \pm 15.8\%$ ) accounted for 81% of the E-field vertices in the OFC. (Fig. 4 - **Panel B**).

# *The relation between TMS targets and downstream brain regions*

At the dlPFC, on the lateral left cortical surface, the IPL, frontal and parietal opercula, and lateral PFC were the major VAN nodes. Lateral FPN nodes included the IPL, the lateral-ventral and lateral PFC, and the posterior region of the middle and inferior temporal gyri. Medially, the FPN nodes consisted of the medial-posterior PFC and the precuneus. The lateral DMN nodes included the lateral PFC, ventral PFC and IPL. Medially, the DMN nodes included the dorsal-medial and medial PFC. Once again, similar to the previous sections, no VAN nodes were observed on the medial cortical surface (Fig. 4 - **Panel C [top]**). At the OFC, on the lateral cortical surface, the FPN nodes included the IPL, lateral-ventral and lateral PFC. Medial FPN nodes included the precuneus and medial-posterior PFC. Within the DMN, the IPL, lateral and dorsal PFCs and the anterior region of the middle and inferior temporal gyri were noted as the main lateral nodes. Medially, the precuneus, PCC, dorsal-medial and medial PFC made up the DMN nodes (Fig. 4 - **Panel C [bottom]**).

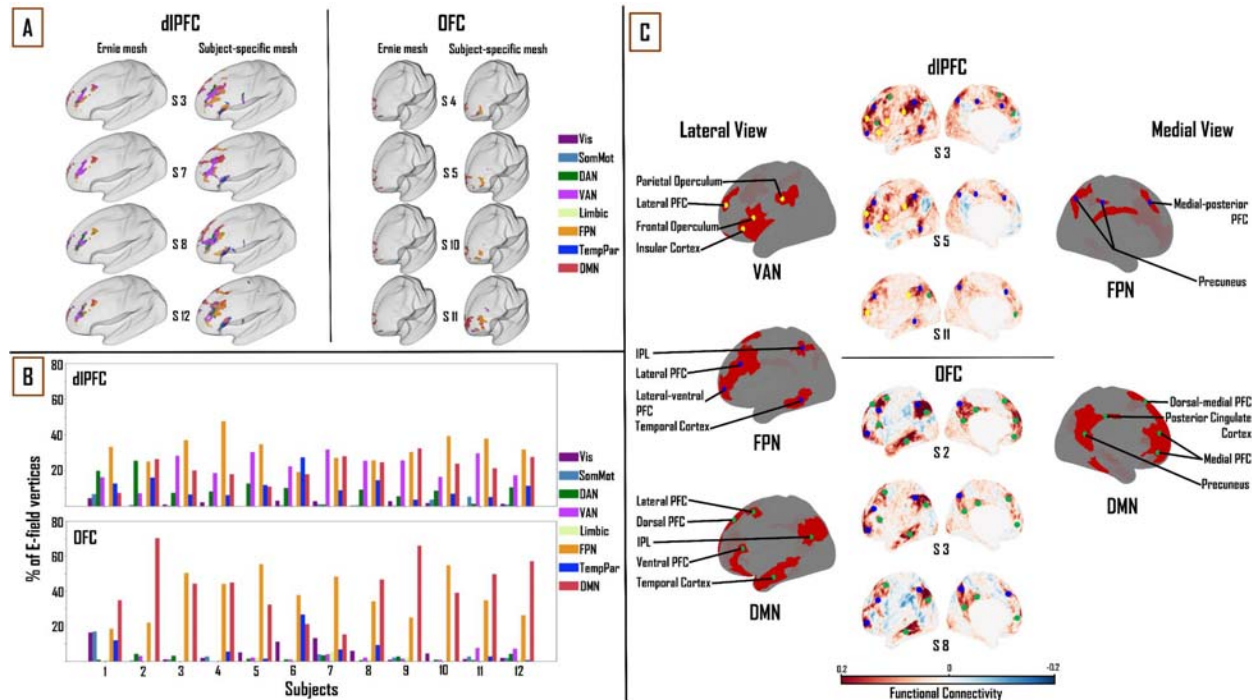

**Figure 4: Combined influence of individual cortical geometry and individual FC on TMS target connectivity. A)** Differences in patterns of FC between fixed ('ernie') and subject-specific E-fields. **B)** The maximum FC of each functional network is shown, represented as a percentage of the thresholded E-field vertices for each subject. *Top:* VAN, FPN and DMN accounted for 76% of the E-field vertices in dIPFC. *Bottom:* FPN and DMN accounted for 81% of the E-field in OFC. **C)** *Top:* lateral and medial views of dIPFC FC maps in subjects 3, 5 and 11, highlighting the key regions that are functionally connected across the VAN, FPN and DMN. These regions lie mainly in the frontal, parietal and temporal cortices. *Bottom:* lateral and medial views of OFC FC maps in subjects 2, 3 and 8, highlighting the key regions that are functionally connected across FPN and DMN. These regions lie mainly in medial-frontal, cingulate, and posterior parietal cortices. VAN = ventral attention network, FPN = fronto-parietal network, DMN = default-mode network.

## Discussion

In this study, we sought to characterize comprehensively two major therapeutic TMS target sites, the dIPFC and the OFC, in terms of a) their patterns of FC to other regions and canonical brain networks, and b) the level and sources of inter-subject variability in those connectivity patterns, using a combination of E-field modelling and analyses of resting state fMRI data in a group of healthy subjects. With respect to the first of these, our chief conclusion was that three major functional networks were targeted across the dIPFC and OFC: VAN, FPN and DMN in the



dIPFC, and FPN and DMN in the OFC. Furthermore, while these major networks consistently appeared across all subjects, the relative connectivity strengths between the networks, as well as the downstream nodes within each network, varied considerably on a subject-wise basis. This is consistent with previous observations in both animals (Bergmann et al., 2020) and humans (Mueller et al., 2013). With respect to the question of the level and sources of variability, our approach was to separate, and study both independently and in combination, the effects of variability in skull anatomy and cortical geometry (as encapsulated in subject-specific E-field maps), and of variability in subject-specific FC maps. These analyses showed that the average E-field and group-average FC data are able to predict which networks are targeted, for some networks, but cannot necessarily tell the degree to which each individual network is specifically targeted across subjects. In the following we discuss the key components of these findings, their interpretation in relation to previous work, and highlight important caveats and limitations.

### *Connectivity of TMS targets*

Regions showing strong FC with TMS targets give us some insight into the potential functional effects of TMS stimulation. The results of our study revealed the VAN, FPN and DMN as the major functional networks targeted by dIPFC TMS, and the FPN and DMN as the major networks targeted by OFC TMS. Specific network nodes within each of these networks were observed. Some network nodes such as the lateral PFC (VAN, FPN, DMN) and precuneus (FPN, DMN) were seen across all subjects and in multiple networks. On the other hand, certain networks and nodes were specific to dIPFC TMS or OFC TMS. For example, the connectivity to the VAN is seen in dIPFC TMS, but not in OFC TMS. At the level of individual network nodes, the PCC is a DMN-specific node in E-field FC patterns for OFC TMS targets, but not dIPFC TMS targets. Furthermore, while many similar nodes occur across these networks in multiple subjects, the overall pattern of FC observed varies from subject to subject. The relevance and important functions of the three major functional networks highlighted in these results (FPN, DMN and VAN) are outlined below.

The FPN is a system implicated in cognitive control for regulating goal-driven behaviour. This network is believed to play a key role in problem solving, as well as actively preserving and

editing the information stored in working memory (Uddin et al., 2019). The DMN is active during resting wakefulness, when an individual is not actively engaged with external stimuli (Fox et al., 2005). The DMN is also involved in ruminative processes, specifically with thoughts concerning oneself, their past or future events (Andrews-Hanna, 2012). The VAN, sometimes called the salience network, keeps track of salient events (triggered by sensory stimuli) and plays a role in response inhibition or selection (Menon and Uddin, 2010). The VAN is crucial for spontaneous cognitive control, where it helps switch between the DMN's ruminative/self-reflective functions to the FPN's task-based/externally driven functions (Menon, 2011; Menon and Uddin, 2010). Neuroimaging studies have shown that the heterogeneous nature of MDD and its subtypes may emerge as a result of unique patterns of disruption in these networks' dynamics (Feffer et al., 2018). Indeed, multiple research groups have begun to utilize abnormal FC patterns to characterize MDD subtypes (Peng et al., 2012), showing how differences in spontaneous dynamics might potentially lead to different clinical outcomes (Fox et al., 2012). In line with this evidence, our results suggest that a connectivity-based targeting strategy for optimizing network engagement on a per-subject basis may be beneficial for optimizing clinical responses.

### *Implications for rTMS therapy*

A systematic review of 25 neuroimaging studies of MDD summarized that hypoconnectivity occurs within the FPN and VAN, while regions that were a part of the DMN exhibited hyperconnectivity (Kaiser et al., 2015). There are multiple inhibitory and excitatory rTMS protocols used for inducing region-specific changes in neural activity. Excitatory paradigms include intermittent theta burst stimulation (iTBS) and high-frequency (10-20Hz) rTMS, whereas prevalent inhibitory paradigms are continuous theta burst stimulation (cTBS) and low frequency (~1Hz) rTMS (Downar and Daskalakis, 2013; Huang et al., 2005). The implications from our results may further enhance rTMS targeting practices by informing not only region but type of paradigm to use as well. In our study, 10 subjects had a higher number of vertices targeting the FPN or VAN than DMN, in the dlPFC (Figure 4 - **Panel B [top]**). Therefore, one way of understanding the positive therapeutic effects of applying iTBS or high frequency rTMS at the dlPFC in MDD patients may be that this intervention could result in an excitation - and perhaps

renormalization - of the VAN and FPN networks, which show hypoconnectivity in MDD (Kaiser et al., 2015). At the OFC, our results show that 7 out of 12 subjects have a higher number of vertices targeting the DMN than the FPN (Figure 4 - **Panel B [bottom]**). In this case, applying cTBS or low-frequency rTMS may be expected to inhibit the DMN, and again potentially achieve a renormalization of DMN hyperconnectivity in MDD. Targeting specific networks with unique rTMS paradigms in this way may alleviate depressive symptoms more efficiently. In the future, this line of research may be further explored to identify which networks are affected in a given patient, and selectively targeting them, thereby potentially personalizing rTMS therapy for individuals with MDD.

### ***Functional Connectivity Variability***

We calculated the Pearson correlation coefficient between the percentage of E-field vertices for the VAN, FPN and DMN, across all subjects, for the group average FC matrix and the subject-specific FC matrix. The group average FC matrices were able to predict inter-individual differences in how networks were targeted from the dlPFC and OFC, to a certain extent. In the dlPFC, we observed that the 1003-subject HCP average FC matrix was able to predict what DMN connectivity would be with the subject-specific FC matrices ( $r=0.67$ ). This was not the case with the VAN ( $r=0.07$ ) and FPN connectivity ( $r=0.03$ ). However, this observation was reversed in the OFC. Here, the average FC matrix was able to predict what FPN connectivity would be with subject-specific FC matrices ( $r=0.52$ ) but not with the DMN ( $r=0.2$ ). One explanation for this finding is that DMN has a more consistent spatial pattern across subjects than the VAN or FPN, such that subject-level and group-level patterns are relatively more similar than for other networks. However, this line of reasoning does not explain why a pattern reversal occurs at the OFC. In summary, our results confirm the general intuition that using an average FC matrix provides a gross estimate of what the targeted networks might be, but precise targeting requires each subject's specific FC data.

### ***E-field Variability***

We observed the mean subject-specific thresholded E-field size to be 663 and 162 vertices, in the dlPFC and OFC, respectively. However, the E-field size varied considerably across subjects, with a standard deviation of  $\pm 200$  vertices in the dlPFC and  $\pm 56$  vertices in the OFC. This high intersubject variability of dlPFC and OFC E-fields can be attributed to variability in subject-specific cortical geometry. Consistent with this, the boundaries between the five main tissue types have been shown to affect E-field distributions. These include the skin, skull, CSF, white matter, and gray matter (Thielscher et al., 2011), and are highly variable across subjects. Furthermore, this E-field variability had a knock-on effect on variability in the connectivity of the dlPFC and OFC stimulation targets to downstream functional networks. In the dlPFC, the normative template E-field (from the ‘ernie’ brain) and subject-specific E-fields showed a similar pattern of targeting to the VAN and FPN in each subject’s specific FC matrix ( $r=0.82$  and  $0.76$ , respectively). However, this was not the case with the DMN ( $r=-0.05$ ). In the OFC, the opposite was found to be true. The normative template E-field and subject-specific E-field showed a similar pattern of targeting to the DMN ( $r=0.7$ ), but not so much with the FPN ( $r=0.4$ ). A potential reason for this observation is the large difference in size between the template E-field and the subject-specific E-fields. In the dlPFC, the subject-specific E-fields are twice as large (mean = 663 vertices) as the template E-field (310 vertices). The difference is greater in the OFC, with the subject-specific E-fields (mean=162) being over two and half times the size of the template E-field (63 vertices). The additional vertices in each subjects’ specific E-field tend to target the VAN and FPN in the dlPFC, as the E-field vertices here are predominantly present on the ventral/lateral surface of the prefrontal cortex. The DMN, being more medially located overall, therefore has much lower connectivity to dlPFC when the template E-field is used than when subject-specific E-fields are used (Figure 4 - **Panel A [left]**). Furthermore, this line of reasoning can be extended to account for the pattern reversal observed in the OFC, where the template E-field does not account for the additional vertices in the subject-specific E-fields which are spread more laterally, targeting the FPN (Figure 4 - **Panel A [right]**), and hence shows a pattern targeting the DMN but not the FPN.

### ***Caveats and Limitations***

While the results of this study are promising, there are some important caveats and limitations to highlight.

One important limitation is the fact that we only use the left hemisphere to study TMS target connectivity. The reason for this choice was in part practical (simplifying surface-based analysis), but also reflected the fact that as a rule we expect FC patterns to the two TMS target zones to be dominated by intrahemispheric connections, with the obvious exception of the contralateral homologue (i.e., right dlPFC and right OFC). By using FC data from only one hemisphere, we are therefore potentially missing some important differences between subjects and TMS targets in their connectivity to the contralateral homologues. However, given that our focus here is on patterns of FC to distal cortical regions that are outside of either the primary target area or its hemispheric homologue, we feel this approach is justified.

Another important limitation is the E-field threshold, and its effect on resultant FC calculations. In this study, the E-field threshold was set to 0.9 V/m, which is slightly lower than that used by (Romero et al., 2019). Our justification for this choice is that higher thresholds (i.e., above 0.9 V/m) shrink the E-field sizes, especially in the OFC, and hamper FC calculations. The problem remains however that in the field of TMS more broadly, it is not yet clear what a 'correct' E-field threshold should be. Often this is conceived as the minimum induced current necessary to depolarize neuronal membranes and cause them to fire. Subthreshold effects (i.e. ones not resulting from action potential induction at the primary stimulation site) may nevertheless potentially have an important role in TMS responses; for example by facilitating the occurrence and frequency of suprathreshold events. Spatially, the question of E-field thresholding relates quite closely to the question of E-Field size and extent (since high thresholds usually 'trim' the edges of activated areas, eliminating vertices around the penumbra first).

A further, related, limitation is that interpretation of our results, and those from related work (e.g. Opitz et al., 2016) rests heavily on the notion that FC can serve as a reliable indicator of which downstream brain regions, distal to the TMS target site, would themselves be 'activated', or otherwise affected, by TMS administration. In defense of this principle, multiple studies have shown experimentally that neuronal activation as a result of TMS is not limited to the cortical circuits closest to the scalp (Bergmann et al., 2021; Hawco et al., 2018; Siebner et al., 2009;

Solomon-Harris et al., 2016). These studies show that initial local neuronal activation spreads across cortical and subcortical regions to neighbouring and distant parts of the brain. In other words, it appears to be impossible to stimulate a single region of the brain with TMS without affecting a large number of downstream network nodes. While further studies are required to decipher the precise pathways taken to activate these downstream nodes, FC maps offer a plausible proxy for assessing which networks are being engaged for a given TMS target region.

We note that the sample size used in the present study is a further potential limitation. Our reasoning here was that by focusing on a relatively small number of subjects, we could conduct an in-depth analysis of downstream TMS target connectivity, with extensive visual comparisons. Our detailed study of how E-field sizes affect TMS target connectivity, and our close look at FC maps highlighting key downstream nodes within major functional networks, justifies, we believe, the moderate sample size for this specific investigation.

Importantly, the subjects chosen for this study are from a normative, healthy sample (from the HCP database). However, MDD patients may have different/altered connectivity patterns that the healthy subject patterns may not be representative of. While previous research has looked at connectivity-based targeting in MDD patients with promising results (Weigand et al., 2018), a full-fledged clinical trial evaluating this method is yet to be undertaken (Cash et al., 2020).

One potential improvement to the methodology used here that may be considered for future work is to evaluate alternative TMS coil options. Here, we have chosen to use the Magstim 70mm Figure-8 coil to run our TMS simulations in SimNIBS. Used in both clinical and research settings, it has been shown that Figure-8 coils allow for a more focused stimulation of the target site (Thielscher and Kammer, 2004) than other design options. We used the Figure-8 coil type to run our simulations for both the dlPFC and OFC. However, the thresholded E-field size difference between these two TMS targets in our analyses is likely due mainly to their anatomical locations, and distance from the stimulating coil. The dlPFC is located at the frontal lobe and lies on the lateral and dorsal surface of the medial convexity, fairly close to the scalp surface. The OFC, on the other hand, is a large gray matter shelf located on the ventral surface of the frontal lobes, above the orbit of the skull. As a result, a large portion of the OFC is not accessible via the Fp1 electrode position on the scalp (which is more frontal in location than



ventral). Thus, a typical Figure-8 coil cannot target the OFC as effectively as it can the dlPFC, owing to the inconsistency of the targeting surface. To address this issue, alternate coil designs have been proposed, such as crown-shaped coils, C-shaped coils (Deng et al., 2008) and H-shaped coils (Levkovitz et al., 2009), which have been developed to target deeper cortical regions. It will be valuable to analyze the resulting E-fields produced by these coils with our current methodology, to better establish the effects of TMS with all potentially available coil configurations on novel treatment sites, such as the ventral OFC and regions of the medial PFC.

## *Conclusions and Future Directions*

We have presented data characterizing the FC patterns of canonical therapeutic TMS targets and the key dimensions of their variability across subjects. Our hope is that these insights prove useful as part of the broader effort by the psychiatry, neurology, and neuroimaging communities to help improve and refine TMS therapy, through a better understanding of the technology and its neurophysiological effects. Further work shall be needed to evaluate the predictive and clinical utility of the TMS target fMRI FC profiles, through both prospective and retrospective clinical neuroimaging studies in MDD patients. Progress on the neurobiological question of what are the network-level effects of TMS stimulation, however, necessitates an integrative approach combining various neuroimaging and physiological modalities, and various quantitative techniques. In particular, characterization of the structural connectivity between TMS targets and their downstream networks using diffusion-weighted MRI tractography analyses, which can serve as a useful proxy for axonal connectivity between various brain regions, shall be an important area of investigation that should complement the results reported in the present study. How do target region connectivity profiles from tractography connectivity compare to their FC analogues? How should discrepancies and convergences between structure and function be interpreted in relation to expected TMS effects? Ultimately the best-known general strategy for reconciling such questions (and one that we are currently pursuing intensively) is to develop validated and predictively accurate computational models of brain stimulation responses, that include relevant biological detail but are also sufficiently scalable to allow whole-brain activity simulations. In future work, our aim is to use mechanistic modelling approaches to formalize and

test hypotheses around synaptic-, local circuit-, and network-level mechanisms in brains receiving noninvasive stimulation, and to use the insights obtained to help improve the efficacy of TMS in the clinic.

## Acknowledgements

We are grateful to the Krembil Foundation, CAMH Discovery Fund, and Labatt Family Network for the generous funding support that has made this research possible. *CRedit author contributions*: SH: Conceptualization, Methodology, Formal analysis, Writing - Original Draft, Writing - Review & Editing, Visualization; JDG: Conceptualization, Methodology, Writing - Review & Editing, Supervision, Funding acquisition; DM: Writing - Review & Editing, Visualization; FM: Writing - Review & Editing.

## References

- Abraham, A., Pedregosa, F., Eickenberg, M., Gervais, P., Mueller, A., Kossaifi, J., Gramfort, A., Thirion, B., Varoquaux, G., 2014. Machine learning for neuroimaging with scikit-learn. *Front. Neuroinform.* 8, 14.
- Andrews-Hanna, J.R., 2012. The brain's default network and its adaptive role in internal mentation. *Neuroscientist* 18, 251–270.
- Anne Weigand, Andreas Horn, Ruth Caballero, Danielle Cooke, Adam P. Stern, Stephan F. Taylor, Daniel Press, Alvaro Pascual-Leone, and Michael D. Fox, 2018. Prospective Validation That Subgenual Connectivity Predicts Antidepressant Efficacy of Transcranial Magnetic Stimulation Sites. *Biological Psychiatry* 84, 28–37.
- Bergmann, E., Gofman, X., Kavushansky, A., Kahn, I., 2020. Individual variability in functional connectivity architecture of the mouse brain. *Commun Biol* 3, 738.
- Bergmann, T.O., Varatheeswaran, R., Hanlon, C.A., Madsen, K.H., Thielscher, A., Siebner, H.R., 2021. Concurrent TMS-fMRI for causal network perturbation and proof of target engagement. *Neuroimage* 237, 118093.
- Boorman, E.D., Rushworth, M.F., Behrens, T.E., 2013. Ventromedial prefrontal and anterior cingulate cortex adopt choice and default reference frames during sequential multi-alternative choice. *J. Neurosci.* 33, 2242–2253.
- Brett, M., Markiewicz, C.J., Hanke, M., Côté, M.-A., Cipollini, B., McCarthy, P., Jarecka, D., Cheng, C.P., Halchenko, Y.O., Cottaar, M., Larson, E., Ghosh, S., Wassermann, D., Gerhard, S., Lee, G.R., Wang, H.-T., Kastman, E., Kaczmarzyk, J., Guidotti, R., Duek, O., Daniel, J., Rokem, A., Madison, C., Moloney, B., Morency, F.C., Goncalves, M., Markello, R., Riddell, C., Burns, C., Millman, J., Gramfort, A., Leppäkangas, J., Sólón, A., van den Bosch, J.J.F., Vincent, R.D., Braun, H., Subramaniam, K., Gorgolewski, K.J., Raamana, P.R., Klug, J., Nichols, B.N., Baker, E.M., Hayashi, S., Pinsard, B., Haselgrove, C.,



Hymers, M., Esteban, O., Koudoro, S., Pérez-García, F., Oosterhof, N.N., Amirbekian, B., Nimmo-Smith, I., Nguyen, L., Reddigari, S., St-Jean, S., Panfilov, E., Garyfallidis, E., Varoquaux, G., Legarreta, J.H., Hahn, K.S., Hinds, O.P., Fauber, B., Poline, J.-B., Stutters, J., Jordan, K., Cieslak, M., Moreno, M.E., Haenel, V., Schwartz, Y., Baratz, Z., Darwin, B.C., Thirion, B., Gauthier, C., Papadopoulos Orfanos, D., Solovey, I., Gonzalez, I., Palasubramaniam, J., Lecher, J., Leinweber, K., Raktivan, K., Calábková, M., Fischer, P., Gervais, P., Gadde, S., Ballinger, T., Roos, T., Reddam, V.R., freec, 2020. nipy/nibabel: 3.2.1. <https://doi.org/10.5281/zenodo.4295521>

Cash, R.F.H., Weigand, A., Zalesky, A., Siddiqi, S.H., Downar, J., Fitzgerald, P.B., Fox, M.D., 2020. Using Brain Imaging to Improve Spatial Targeting of Transcranial Magnetic Stimulation for Depression. *Biol. Psychiatry*. <https://doi.org/10.1016/j.biopsych.2020.05.033>

Deng, Z.-D., Peterchev, A.V., Lisanby, S.H., 2008. Coil design considerations for deep-brain transcranial magnetic stimulation (dTMS). *Conf. Proc. IEEE Eng. Med. Biol. Soc.* 2008, 5675–5679.

Downar, J., Daskalakis, Z.J., 2013. New targets for rTMS in depression: a review of convergent evidence. *Brain Stimul.* 6, 231–240.

Drysdale, A.T., Grosenick, L., Downar, J., Dunlop, K., Mansouri, F., Meng, Y., Fetcho, R.N., Zebly, B., Oathes, D.J., Etkin, A., Schatzberg, A.F., Sudheimer, K., Keller, J., Mayberg, H.S., Gunning, F.M., Alexopoulos, G.S., Fox, M.D., Pascual-Leone, A., Voss, H.U., Casey, B.J., Dubin, M.J., Liston, C., 2017. Resting-state connectivity biomarkers define neurophysiological subtypes of depression. *Nat. Med.* 23, 28–38.

Feffer, K., Fettes, P., Giacobbe, P., Daskalakis, Z.J., Blumberger, D.M., Downar, J., 2018. 1Hz rTMS of the right orbitofrontal cortex for major depression: Safety, tolerability and clinical outcomes. *Eur. Neuropsychopharmacol.* 28, 109–117.

Fettes, P.W., 2020. Orbitofrontal cortex repetitive transcranial magnetic stimulation for the treatment of major depressive disorder.

Fitzgerald, P.B., Hoy, K.E., Anderson, R.J., Daskalakis, Z.J., 2016. A STUDY OF THE PATTERN OF RESPONSE TO rTMS TREATMENT IN DEPRESSION. *Depress. Anxiety* 33, 746–753.

Fox, M.D., Buckner, R.L., White, M.P., Greicius, M.D., Pascual-Leone, A., 2012. Efficacy of transcranial magnetic stimulation targets for depression is related to intrinsic functional connectivity with the subgenual cingulate. *Biol. Psychiatry* 72, 595–603.

Fox, M.D., Liu, H., Pascual-Leone, A., 2013. Identification of reproducible individualized targets for treatment of depression with TMS based on intrinsic connectivity. *Neuroimage* 66, 151–160.

Fox, M.D., Snyder, A.Z., Vincent, J.L., Corbetta, M., Van Essen, D.C., Raichle, M.E., 2005. The human brain is intrinsically organized into dynamic, anticorrelated functional networks. *Proc. Natl. Acad. Sci. U. S. A.* 102, 9673–9678.

Glasser, M.F., Sotiropoulos, S.N., Wilson, J.A., Coalson, T.S., Fischl, B., Andersson, J.L., Xu, J., Jbabdi, S., Webster, M., Polimeni, J.R., Van Essen, D.C., Jenkinson, M., WU-Minn HCP Consortium, 2013. The minimal preprocessing pipelines for the Human Connectome Project. *Neuroimage* 80, 105–124.

Hawco, C., Voineskos, A.N., Steeves, J.K.E., Dickie, E.W., Viviano, J.D., Downar, J., Blumberger, D.M., Daskalakis, Z.J., 2018. Spread of activity following TMS is related to intrinsic resting connectivity to the salience network: A concurrent TMS-fMRI study.

Cortex 108, 160–172.

Huang, Y.-Z., Edwards, M.J., Rounis, E., Bhatia, K.P., Rothwell, J.C., 2005. Theta burst stimulation of the human motor cortex. *Neuron* 45, 201–206.

Janssen, A.M., Oostendorp, T.F., Stegeman, D.F., 2015. The coil orientation dependency of the electric field induced by TMS for M1 and other brain areas. *J. Neuroeng. Rehabil.* 12, 47.

Kaiser, R.H., Andrews-Hanna, J.R., Wager, T.D., Pizzagalli, D.A., 2015. Large-Scale Network Dysfunction in Major Depressive Disorder: A Meta-analysis of Resting-State Functional Connectivity. *JAMA Psychiatry* 72, 603–611.

Kringelbach, M.L., 2005. The human orbitofrontal cortex: linking reward to hedonic experience. *Nat. Rev. Neurosci.* 6, 691–702.

Kumar, S., Singh, S., Chadda, R.K., Verma, R., Kumar, N., 2018. The Effect of Low-Frequency Repetitive Transcranial Magnetic Stimulation at Orbitofrontal Cortex in the Treatment of Patients With Medication-Refractory Obsessive-Compulsive Disorder: A Retrospective Open Study. *J. ECT* 34, e16–e19.

Levkovitz, Y., Harel, E.V., Roth, Y., Braw, Y., Most, D., Katz, L.N., Sheer, A., Gersner, R., Zangen, A., 2009. Deep transcranial magnetic stimulation over the prefrontal cortex: evaluation of antidepressant and cognitive effects in depressive patients. *Brain Stimul.* 2, 188–200.

Mark S. George, Eric M. Wasserman, Wendol A. Williams, Ann Callahan, Terence A. Ketter, Peter Basser, Mark Hallett, Robert M. Post, 1995. Daily repetitive transcranial magnetic stimulation (rTMS) improves mood in depression. *Neuroreport* 6, 1853–1856.

Menon, V., 2011. Large-scale brain networks and psychopathology: a unifying triple network model. *Trends Cogn. Sci.* 15, 483–506.

Menon, V., Uddin, L.Q., 2010. Saliency, switching, attention and control: a network model of insula function. *Brain Struct. Funct.* 214, 655–667.

Mueller, S., Wang, D., Fox, M.D., Yeo, B.T.T., Sepulcre, J., Sabuncu, M.R., Shafee, R., Lu, J., Liu, H., 2013. Individual variability in functional connectivity architecture of the human brain. *Neuron* 77, 586–595.

Opitz, A., Fox, M.D., Craddock, R.C., Colcombe, S., Milham, M.P., 2016. An integrated framework for targeting functional networks via transcranial magnetic stimulation. *Neuroimage* 127, 86–96.

Opitz, A., Windhoff, M., Heidemann, R.M., Turner, R., Thielscher, A., 2011. How the brain tissue shapes the electric field induced by transcranial magnetic stimulation. *Neuroimage* 58, 849–859.

Pascual-Leone, A., Rubio, B., Pallardó, F., Catalá, M.D., 1996. Rapid-rate transcranial magnetic stimulation of left dorsolateral prefrontal cortex in drug-resistant depression. *Lancet* 348, 233–237.

Peng, D.-H., Shen, T., Zhang, J., Huang, J., Liu, J., Liu, S.-Y., Jiang, K., Xu, Y.-F., Fang, Y.-R., 2012. Abnormal functional connectivity with mood regulating circuit in unmedicated individual with major depression: a resting-state functional magnetic resonance study. *Chin. Med. J.* 125, 3701–3706.

Rolls, E.T., 2019. The orbitofrontal cortex and emotion in health and disease, including depression. *Neuropsychologia* 128, 14–43.

Romero, M.C., Davare, M., Armendariz, M., Janssen, P., 2019. Neural effects of transcranial magnetic stimulation at the single-cell level. *Nat. Commun.* 10, 2642.

Schaefer, A., Kong, R., Gordon, E.M., Laumann, T.O., Zuo, X.-N., Holmes, A.J., Eickhoff, S.B.,

Yeo, B.T.T., 2018. Local-Global Parcellation of the Human Cerebral Cortex from Intrinsic Functional Connectivity MRI. *Cereb. Cortex* 28, 3095–3114.

Siebner, H.R., Bergmann, T.O., Bestmann, S., Massimini, M., Johansen-Berg, H., Mochizuki, H., Bohning, D.E., Boorman, E.D., Groppa, S., Miniussi, C., Pascual-Leone, A., Huber, R., Taylor, P.C.J., Ilmoniemi, R.J., De Gennaro, L., Strafella, A.P., Kähkönen, S., Klöppel, S., Frisoni, G.B., George, M.S., Hallett, M., Brandt, S.A., Rushworth, M.F., Ziemann, U., Rothwell, J.C., Ward, N., Cohen, L.G., Baudewig, J., Paus, T., Ugawa, Y., Rossini, P.M., 2009. Consensus paper: combining transcranial stimulation with neuroimaging. *Brain Stimul.* 2, 58–80.

Solomon-Harris, L.M., Rafique, S.A., Steeves, J.K.E., 2016. Consecutive TMS-fMRI reveals remote effects of neural noise to the “occipital face area.” *Brain Res.* 1650, 134–141.

Souery, D., Amsterdam, J., de Montigny, C., Lecrubier, Y., Montgomery, S., Lipp, O., Racagni, G., Zohar, J., Mendlewicz, J., 1999. Treatment resistant depression: methodological overview and operational criteria. *Eur. Neuropsychopharmacol.* 9, 83–91.

Thielscher, A., Antunes, A., Saturnino, G.B., 2015. Field modeling for transcranial magnetic stimulation: A useful tool to understand the physiological effects of TMS?, in: 2015 37th Annual International Conference of the IEEE Engineering in Medicine and Biology Society (EMBC). pp. 222–225.

Thielscher, A., Kammer, T., 2004. Electric field properties of two commercial figure-8 coils in TMS: calculation of focality and efficiency. *Clin. Neurophysiol.* 115, 1697–1708.

Thielscher, A., Opitz, A., Windhoff, M., 2011. Impact of the gyral geometry on the electric field induced by transcranial magnetic stimulation. *Neuroimage* 54, 234–243.

Tik, M., Hoffmann, A., Sladky, R., Tomova, L., Hummer, A., Navarro de Lara, L., Bukowski, H., Pripfl, J., Biswal, B., Lamm, C., Windischberger, C., 2017. Towards understanding rTMS mechanism of action: Stimulation of the DLPFC causes network-specific increase in functional connectivity. *Neuroimage* 162, 289–296.

Uddin, L.Q., Yeo, B.T.T., Spreng, R.N., 2019. Towards a Universal Taxonomy of Macro-scale Functional Human Brain Networks. *Brain Topogr.* 32, 926–942.

Uğurbil, K., Xu, J., Auerbach, E.J., Moeller, S., Vu, A.T., Duarte-Carvajalino, J.M., Lenglet, C., Wu, X., Schmitter, S., Van de Moortele, P.F., Strupp, J., Sapiro, G., De Martino, F., Wang, D., Harel, N., Garwood, M., Chen, L., Feinberg, D.A., Smith, S.M., Miller, K.L., Sotiropoulos, S.N., Jbabdi, S., Andersson, J.L.R., Behrens, T.E.J., Glasser, M.F., Van Essen, D.C., Yacoub, E., WU-Minn HCP Consortium, 2013. Pushing spatial and temporal resolution for functional and diffusion MRI in the Human Connectome Project. *Neuroimage* 80, 80–104.

Van Essen, D.C., Smith, S.M., Barch, D.M., Behrens, T.E.J., Yacoub, E., Ugurbil, K., WU-Minn HCP Consortium, 2013. The WU-Minn Human Connectome Project: an overview. *Neuroimage* 80, 62–79.

Van Essen, D.C., Ugurbil, K., Auerbach, E., Barch, D., Behrens, T.E.J., Bucholz, R., Chang, A., Chen, L., Corbetta, M., Curtiss, S.W., Della Penna, S., Feinberg, D., Glasser, M.F., Harel, N., Heath, A.C., Larson-Prior, L., Marcus, D., Michalareas, G., Moeller, S., Oostenveld, R., Petersen, S.E., Prior, F., Schlaggar, B.L., Smith, S.M., Snyder, A.Z., Xu, J., Yacoub, E., WU-Minn HCP Consortium, 2012. The Human Connectome Project: a data acquisition perspective. *Neuroimage* 62, 2222–2231.

Vila-Rodriguez, F., Frangou, S., 2021. Individualized functional targeting for rTMS: A powerful idea whose time has come? *Hum. Brain Mapp.* <https://doi.org/10.1002/hbm.25543>

800 Weise, K., Numssen, O., Thielscher, A., Hartwigsen, G., Knösche, T.R., 2020. A novel approach  
801 to localize cortical TMS effects. *Neuroimage* 209, 116486.  
802 Yeo, B.T.T., Krienen, F.M., Sepulcre, J., Sabuncu, M.R., Lashkari, D., Hollinshead, M.,  
803 Roffman, J.L., Smoller, J.W., Zöllei, L., Polimeni, J.R., Fischl, B., Liu, H., Buckner, R.L.,  
804 2011. The organization of the human cerebral cortex estimated by intrinsic functional  
805 connectivity. *J. Neurophysiol.* 106, 1125–1165.  
806 Zald, D.H., McHugo, M., Ray, K.L., Glahn, D.C., Eickhoff, S.B., Laird, A.R., 2014. Meta-  
807 analytic connectivity modeling reveals differential functional connectivity of the medial and  
808 lateral orbitofrontal cortex. *Cereb. Cortex* 24, 232–248.  
809



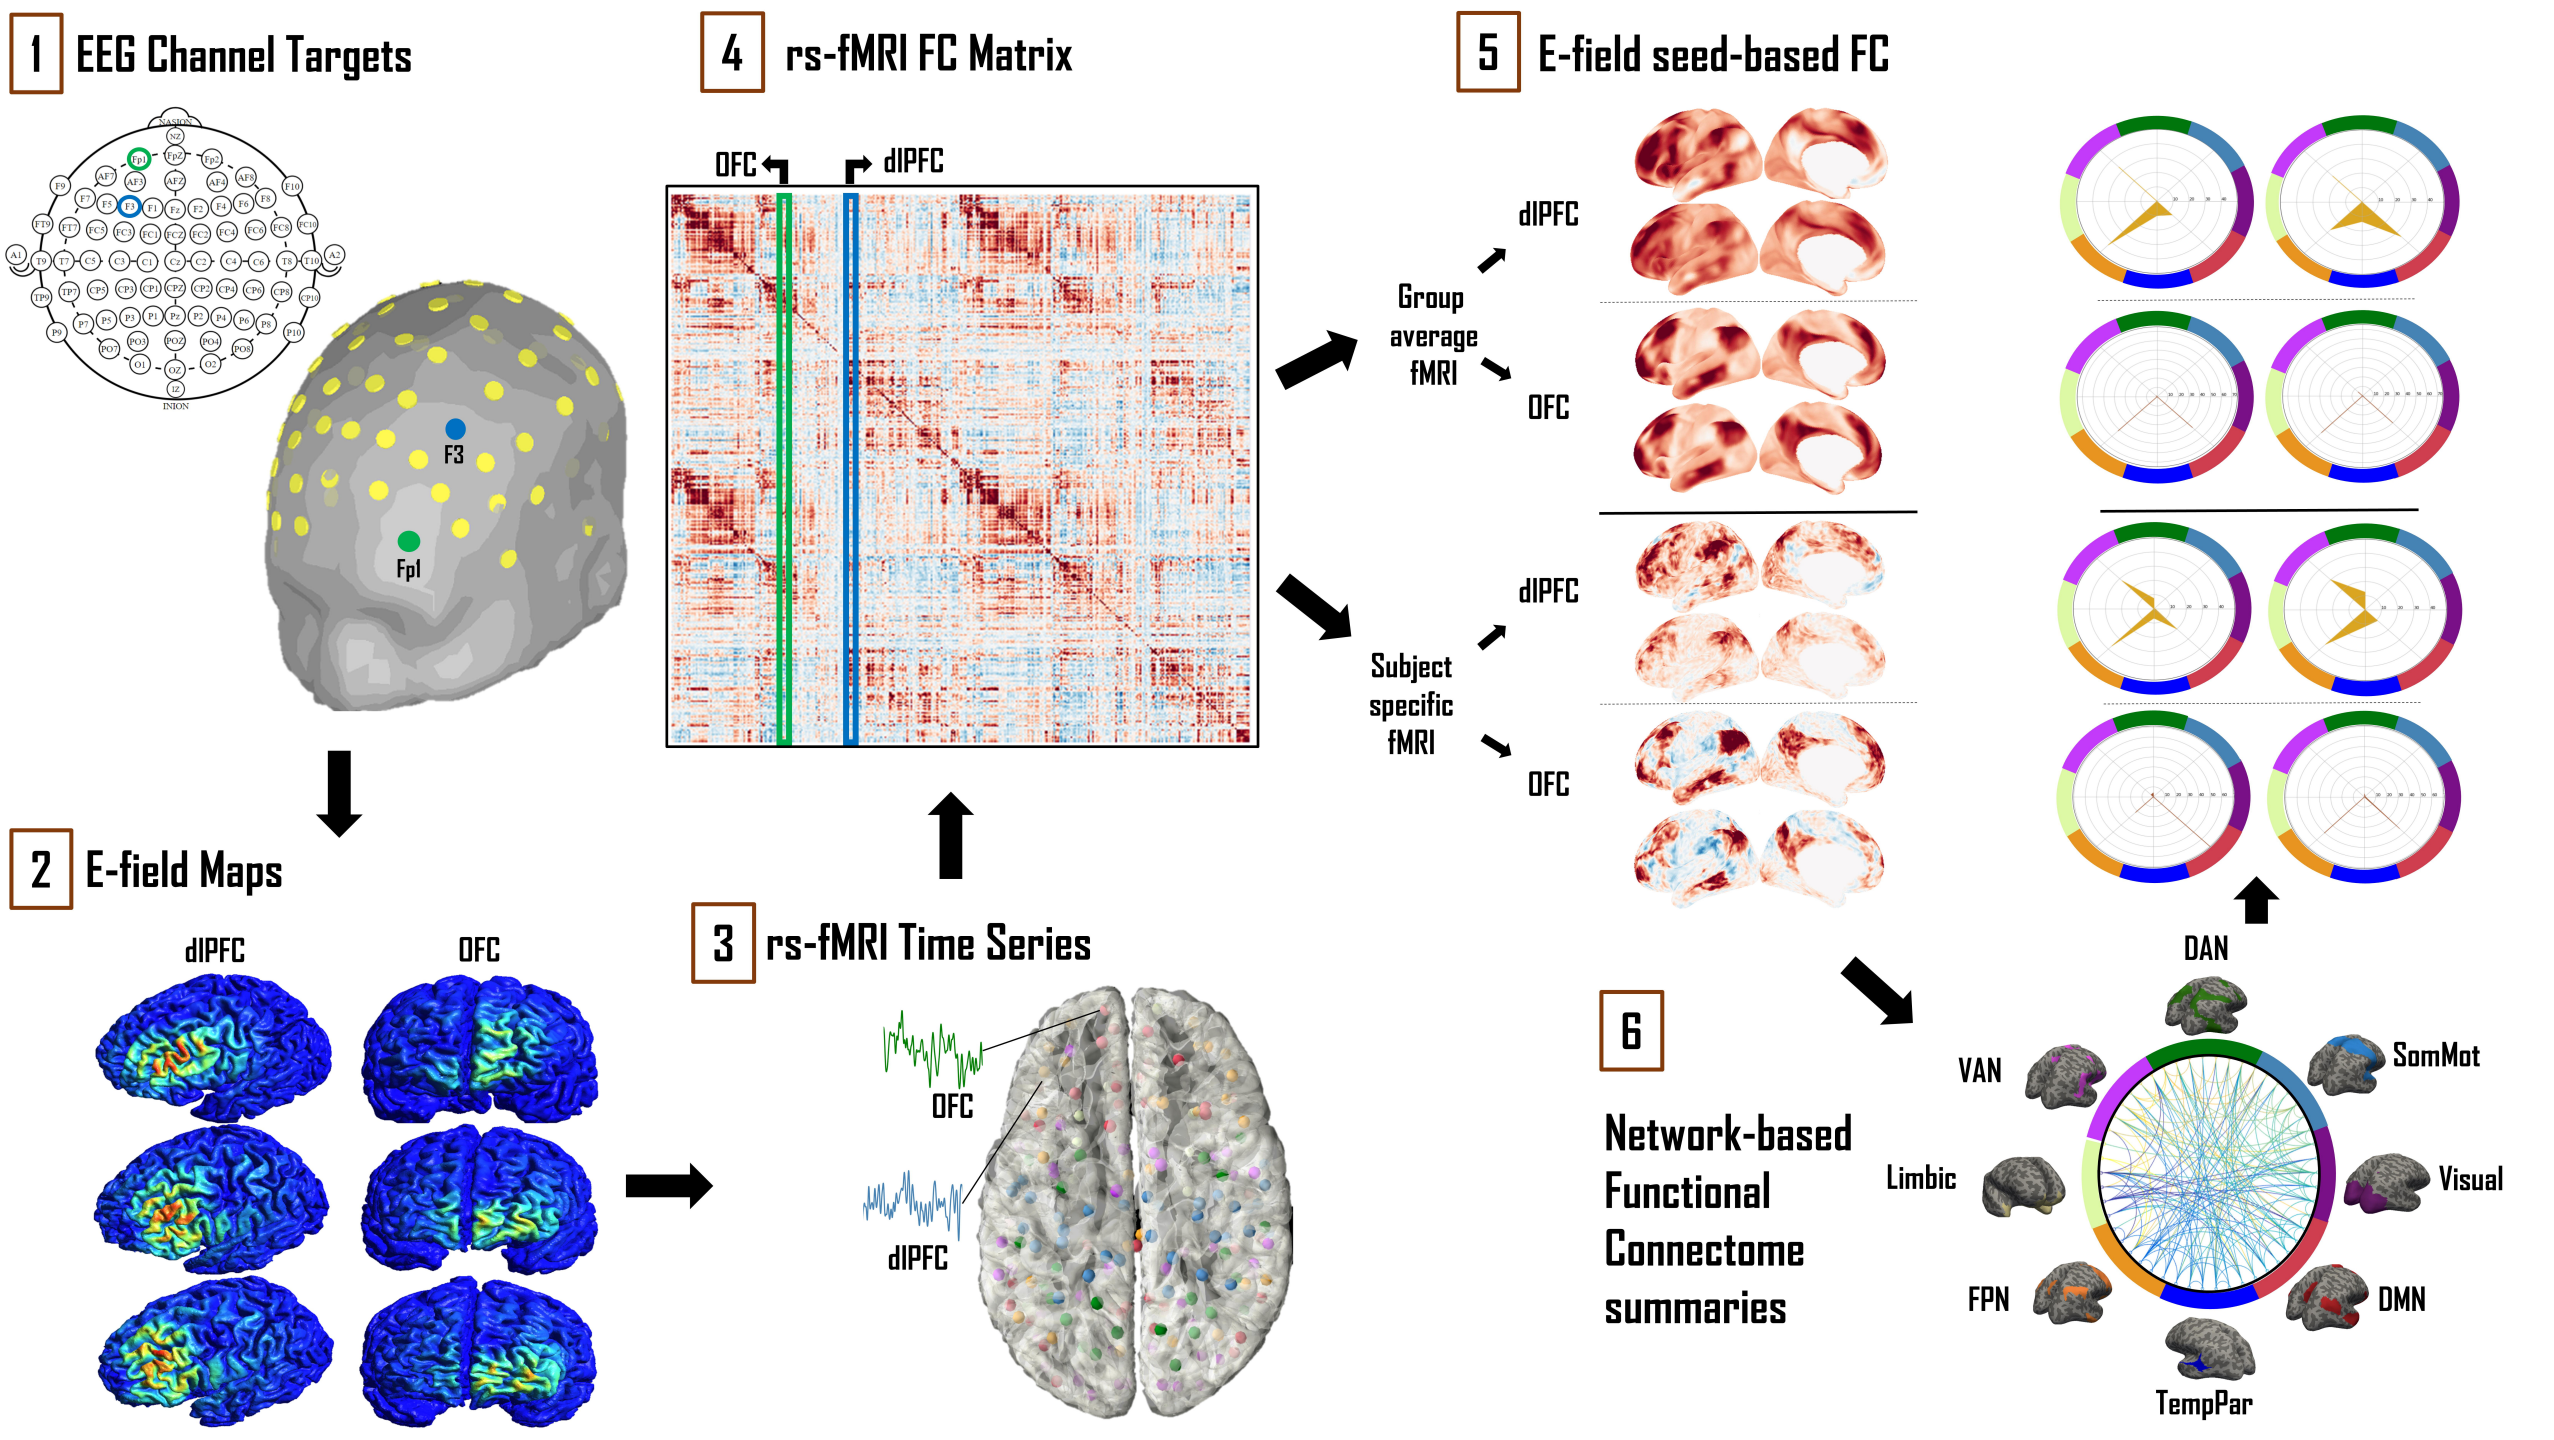

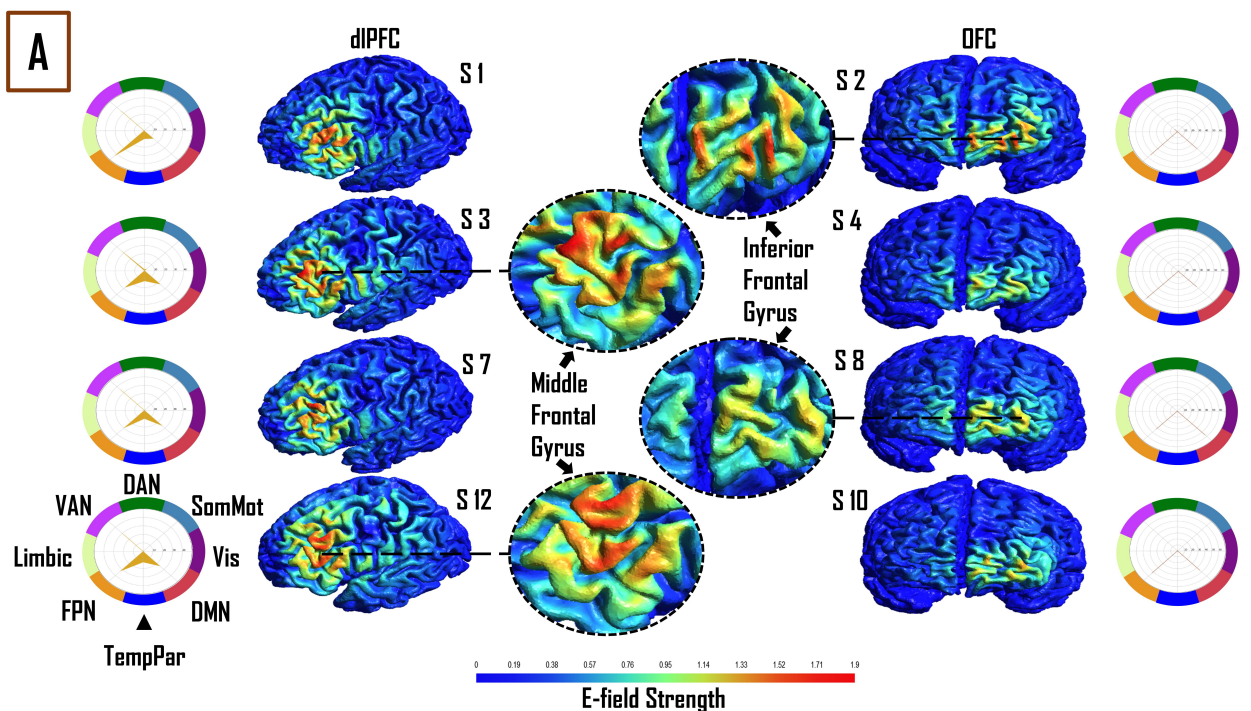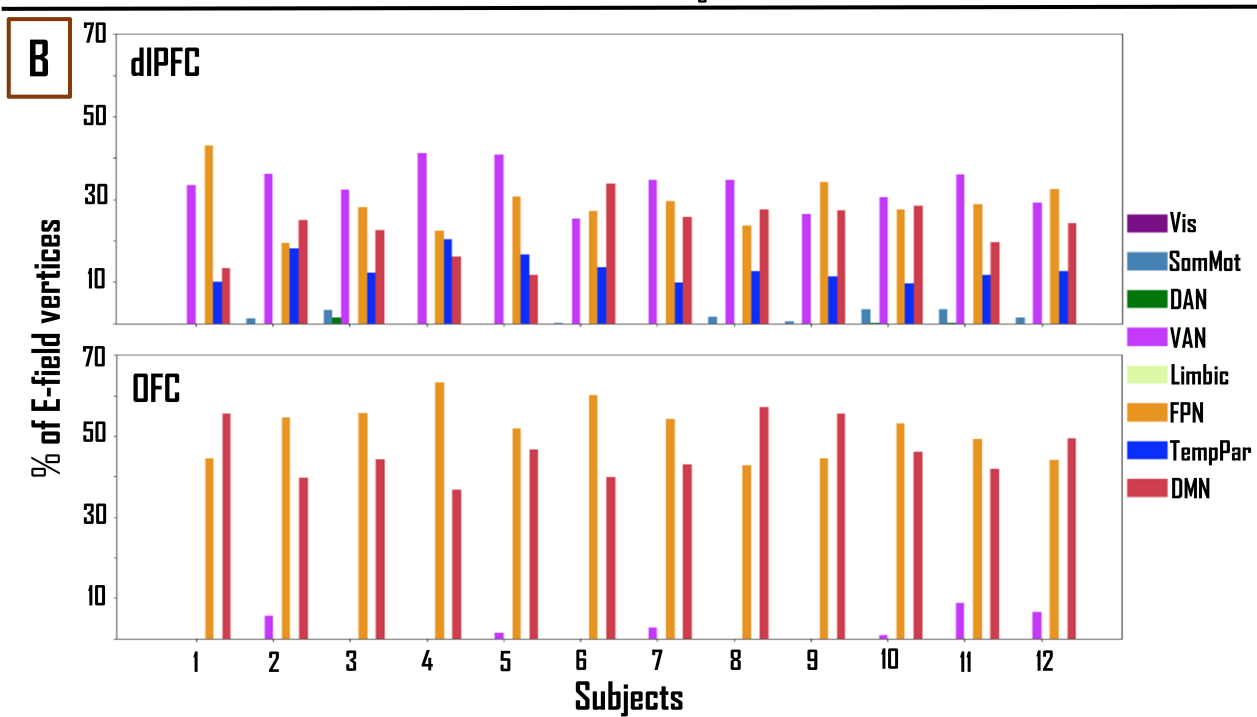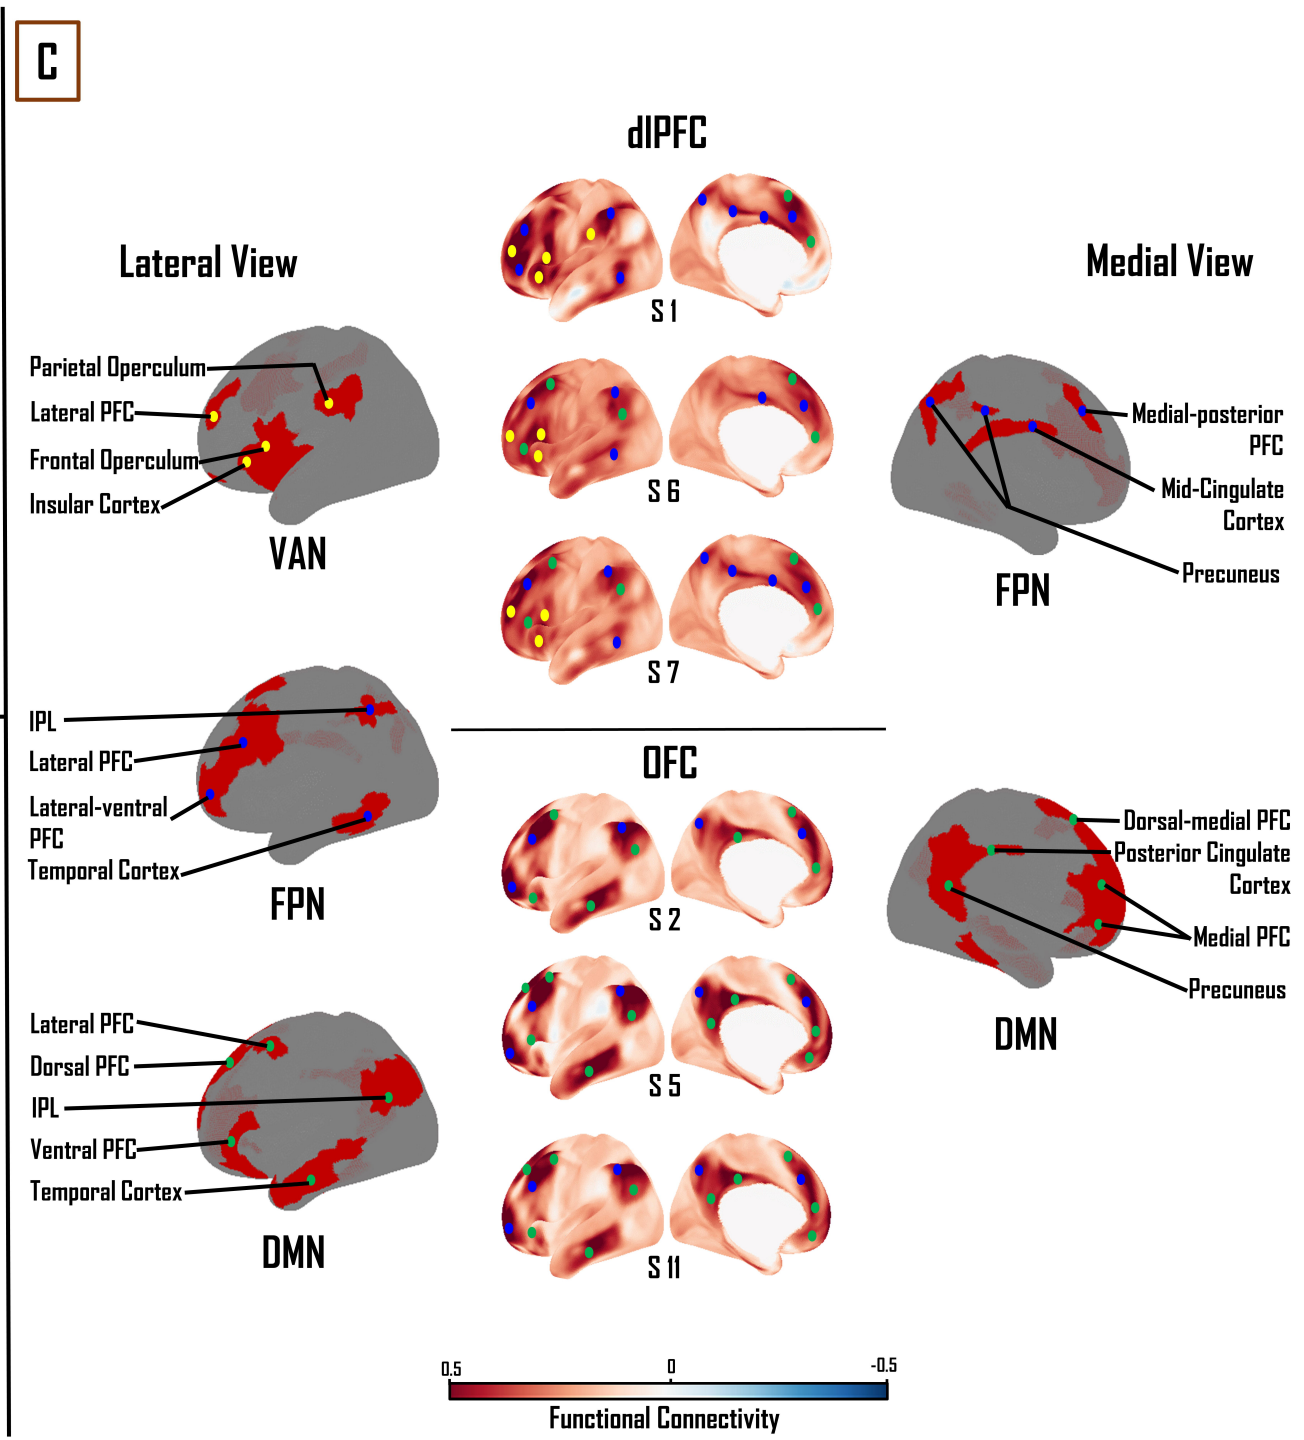



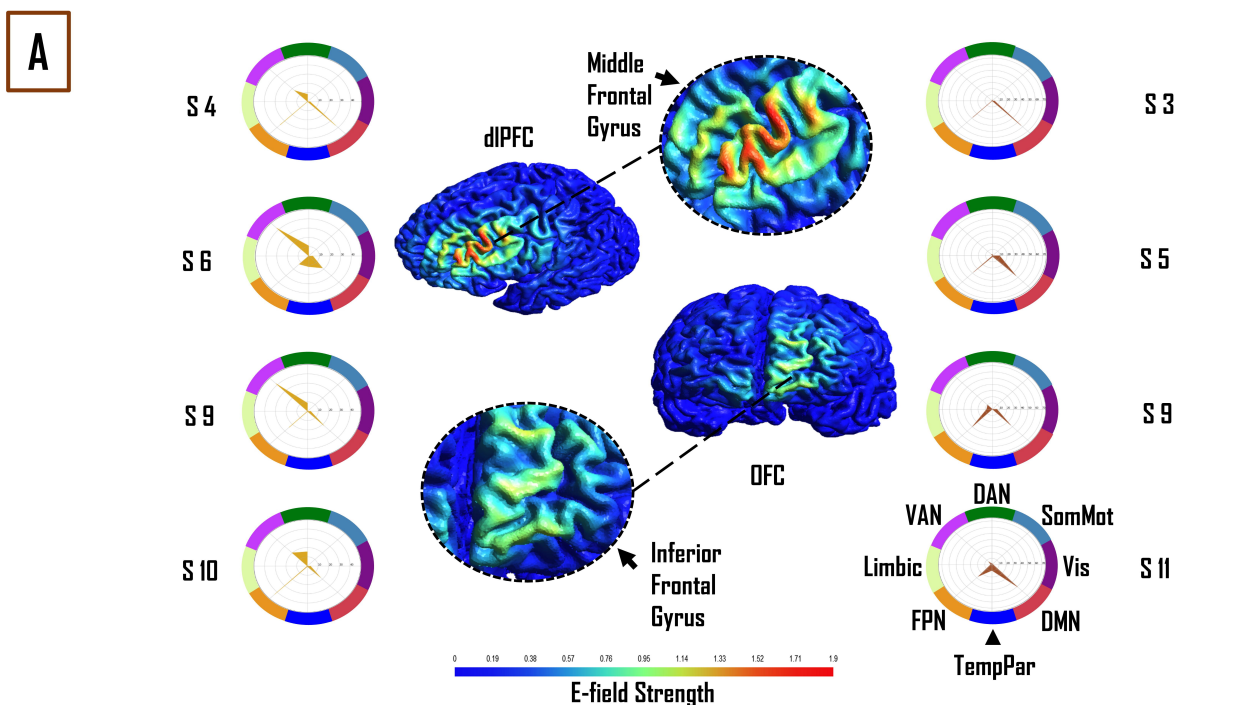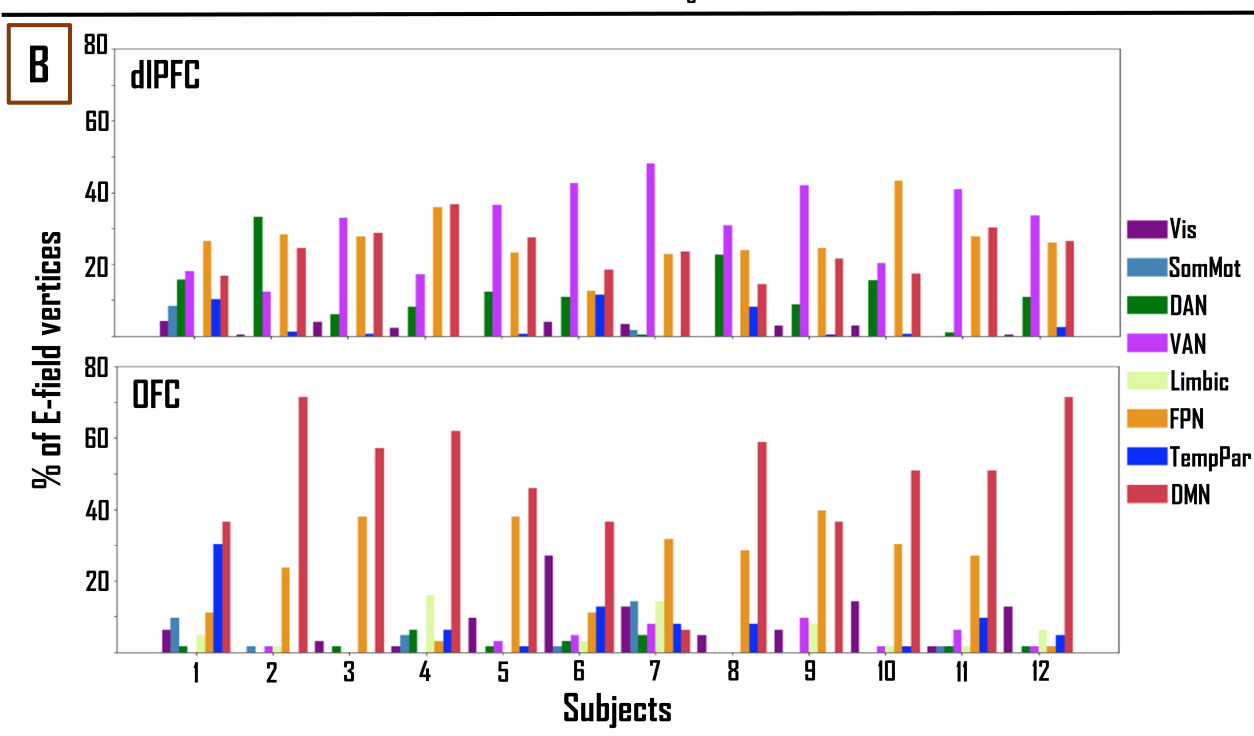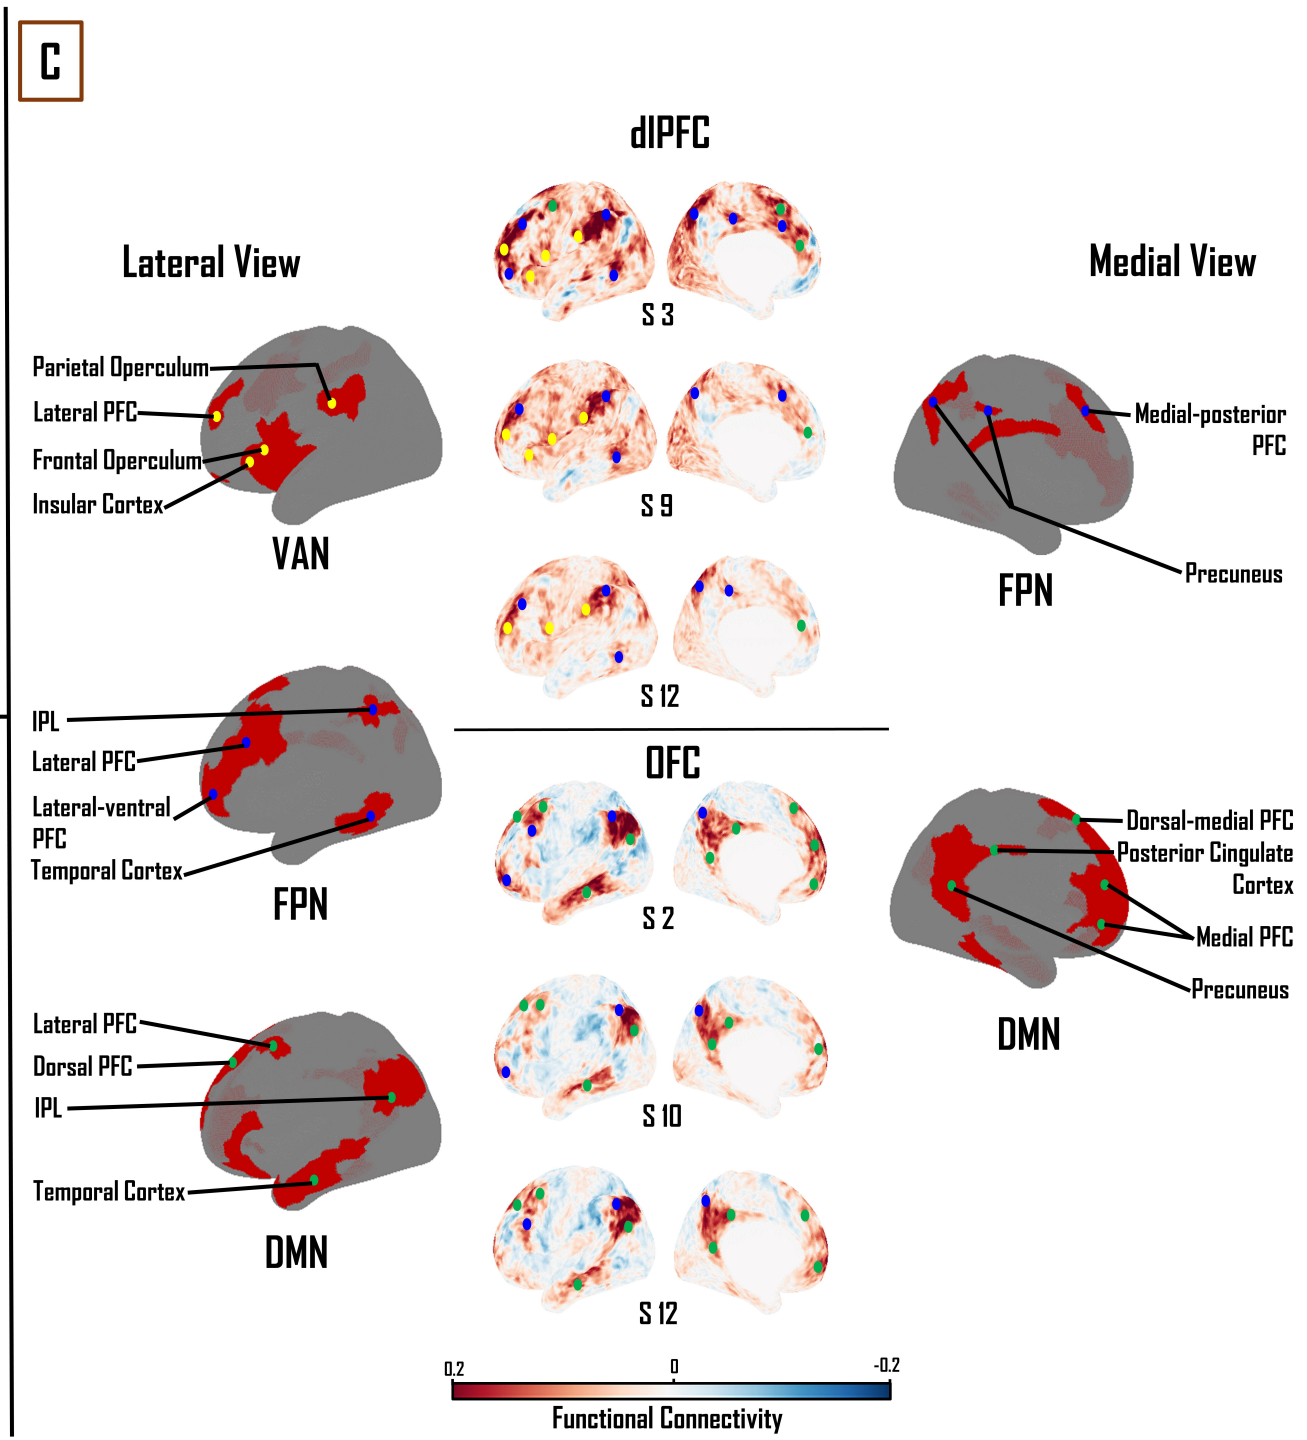

A

dIPFC

OFC

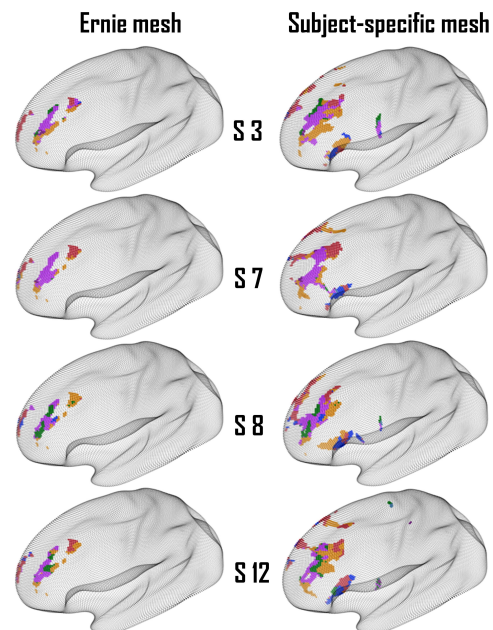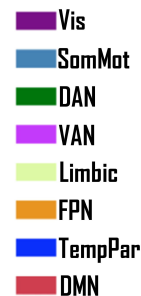

B

dIPFC

OFC

% of E-field vertices

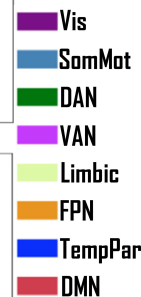

C

Lateral View

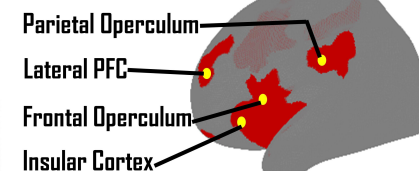

VAN

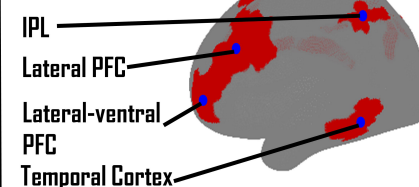

FPN

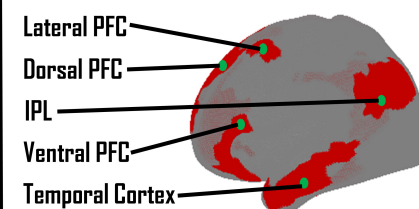

DMN

dIPFC

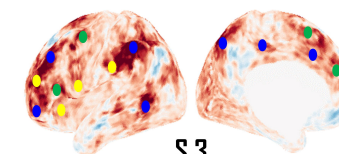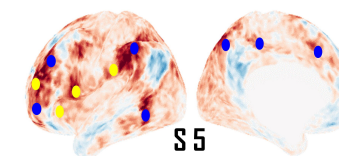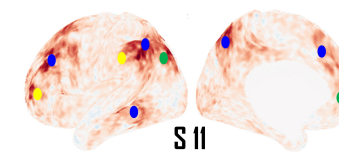

OFC

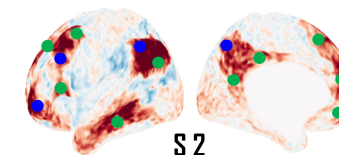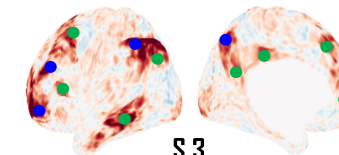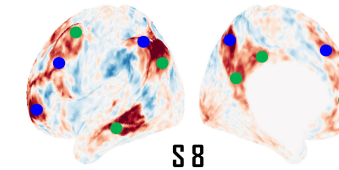

Medial View

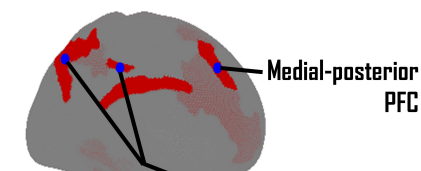

FPN

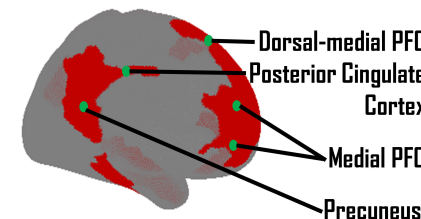

DMN

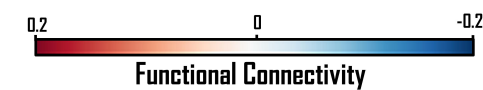

Source: http://biorxiv.org/content/10.1101/2021.07.15.452518v1.full.pdf
